# Supplementary material for: Cycloaddition reactions of heterocyclic azides with 2-cyanoacetamidines as a new route to C,N-diheteroarylcarbamidines
Source: publisher site journal article supplement (doi:10.3762/bjoc.20.3), 2024-01-05
Supplement: Additional file 2 [file 1860-5397-20-3-S2.pdf]

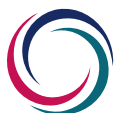

## Supporting Information

for

### **Cycloaddition reactions of heterocyclic azides with 2-cyanoacetamidines as a new route to C,N- diheteroarylcarbamidines**

Pavel S. Silaichev, Tetyana V. Beryozkina, Vsevolod V. Melekhin, Valeriy O. Filimonov,  
Andrey N. Maslivets, Vladimir G. Ilkin, Wim Dehaen and Vasiliy A. Bakulev

*Beilstein J. Org. Chem.* **2024**, *20*, 17–24. doi:10.3762/bjoc.20.3

### **Copies of NMR spectra of all new compounds**

## Table of contents

|                                         |     |
|-----------------------------------------|-----|
| NMR spectra of compounds <b>3a–u</b>    | S2  |
| X-ray Single Crystal Data for <b>3g</b> | S28 |

**Fig. S1.**  $^1\text{H}$  NMR spectrum ( $\text{DMSO-}d_6$ ) of **3a**

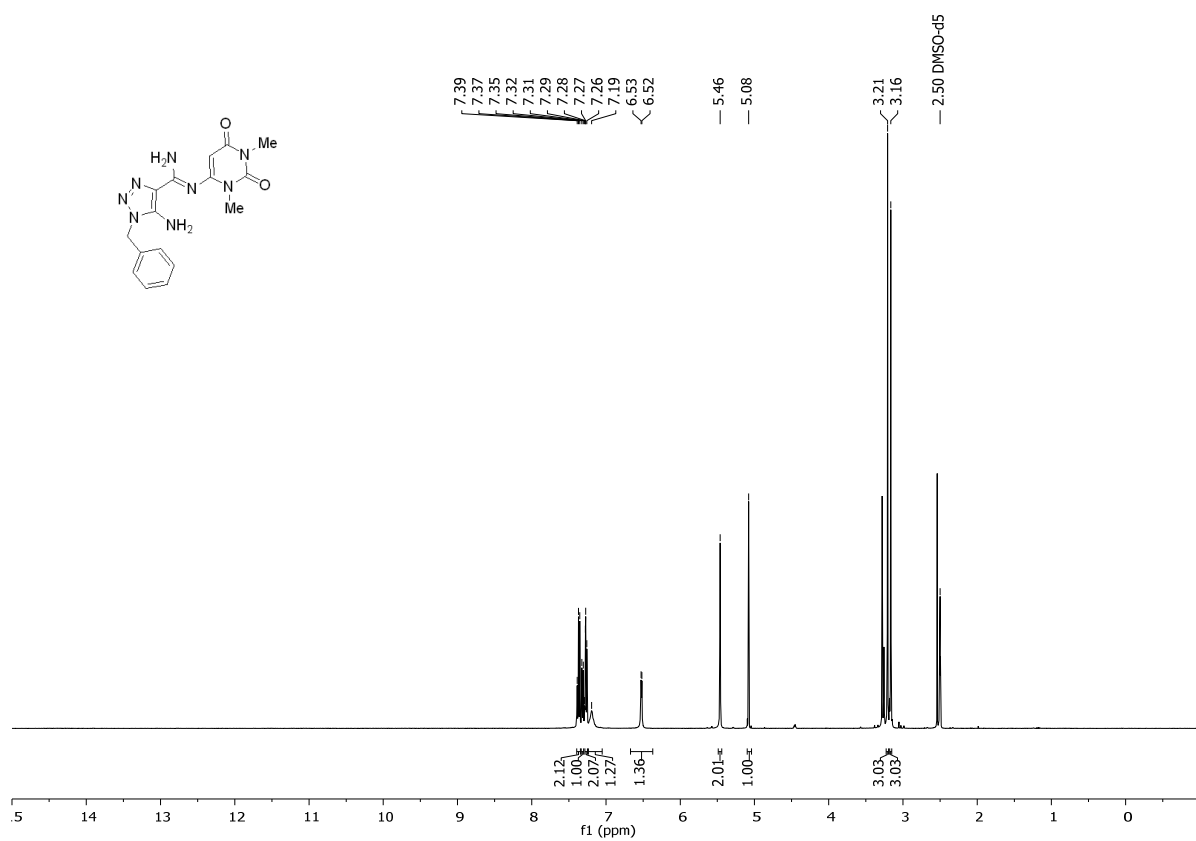

**Fig. S2.**  $^{13}\text{C}$  NMR spectrum ( $\text{DMSO-}d_6$ ) of **3a**

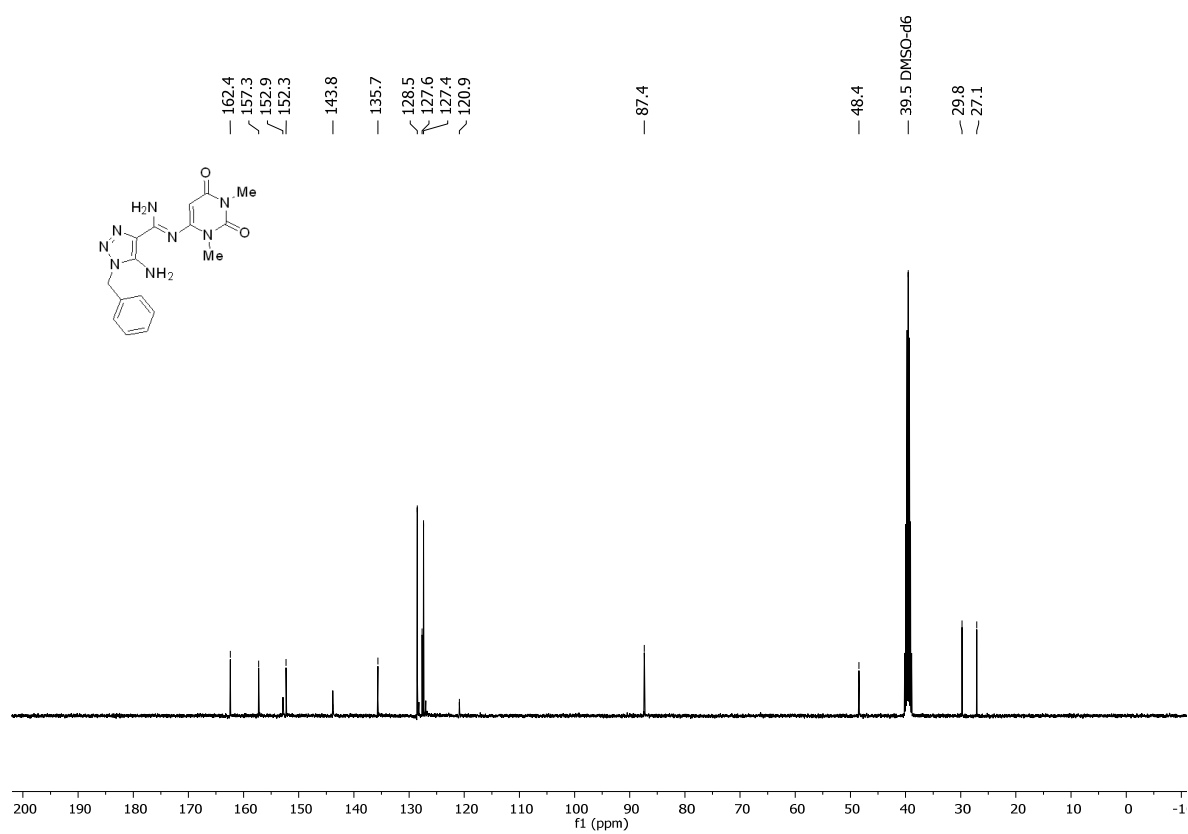

**Fig. S3.**  $^1\text{H}$  NMR spectrum (DMSO- $d_6$ ) of **3b**

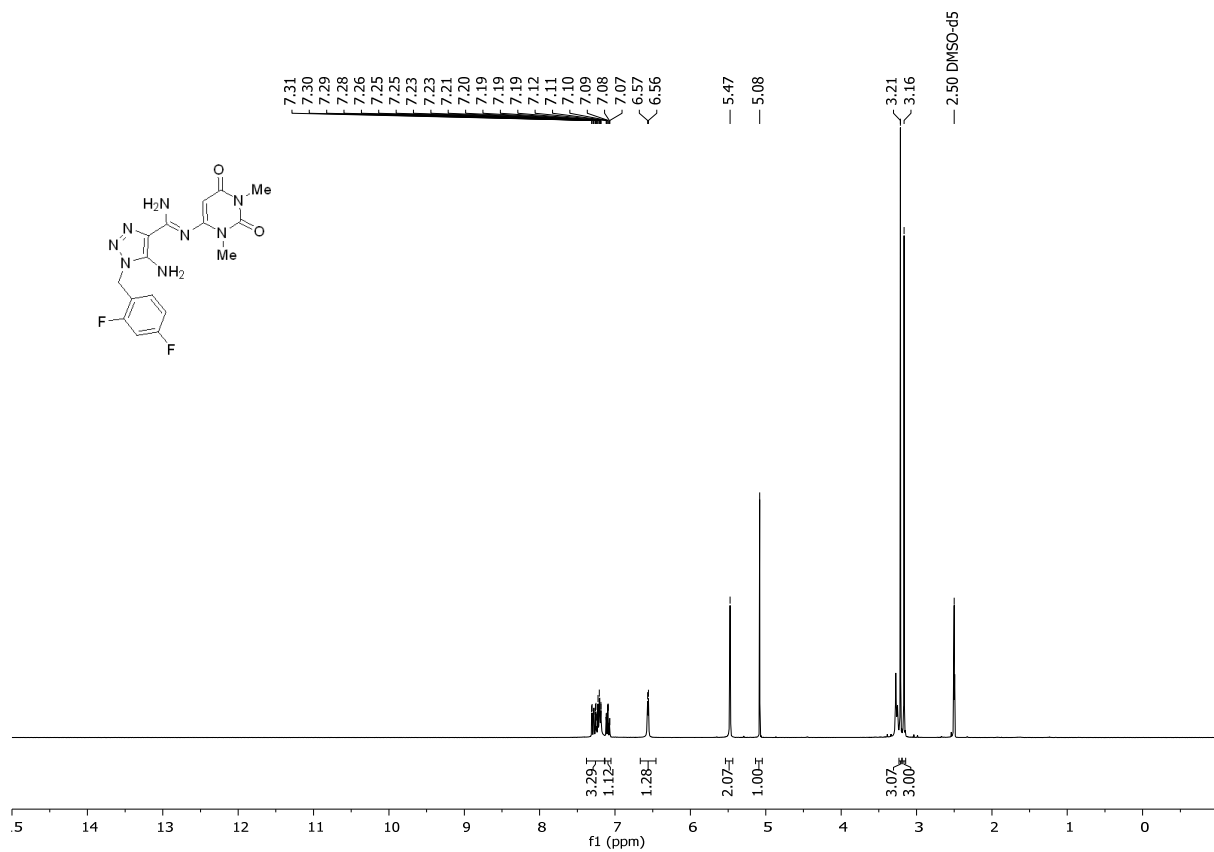

**Fig. S4.**  $^{13}\text{C}$  NMR spectrum (DMSO- $d_6$ ) of **3b**

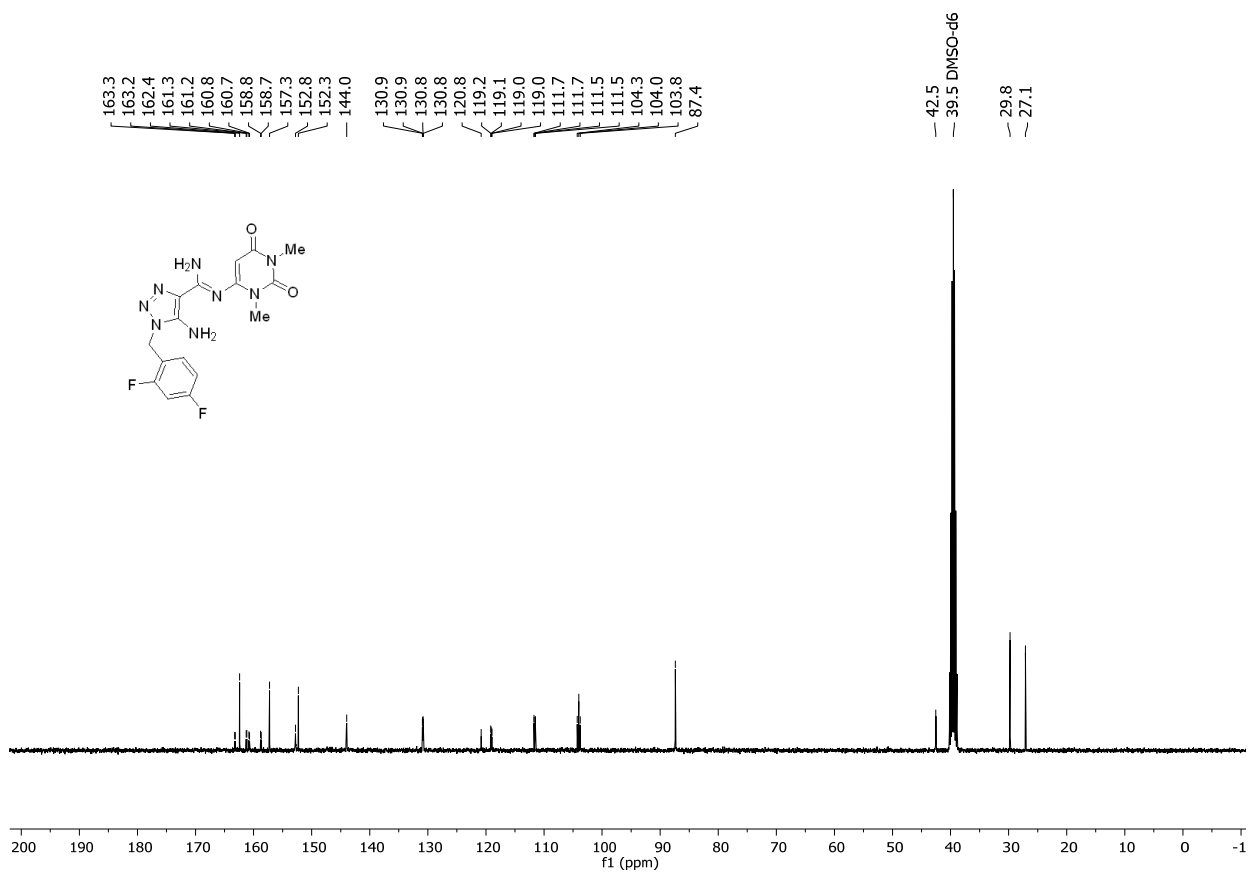

Fig. S5.  $^{19}\text{F}$  NMR spectrum (DMSO- $d_6$ ) of **3b**

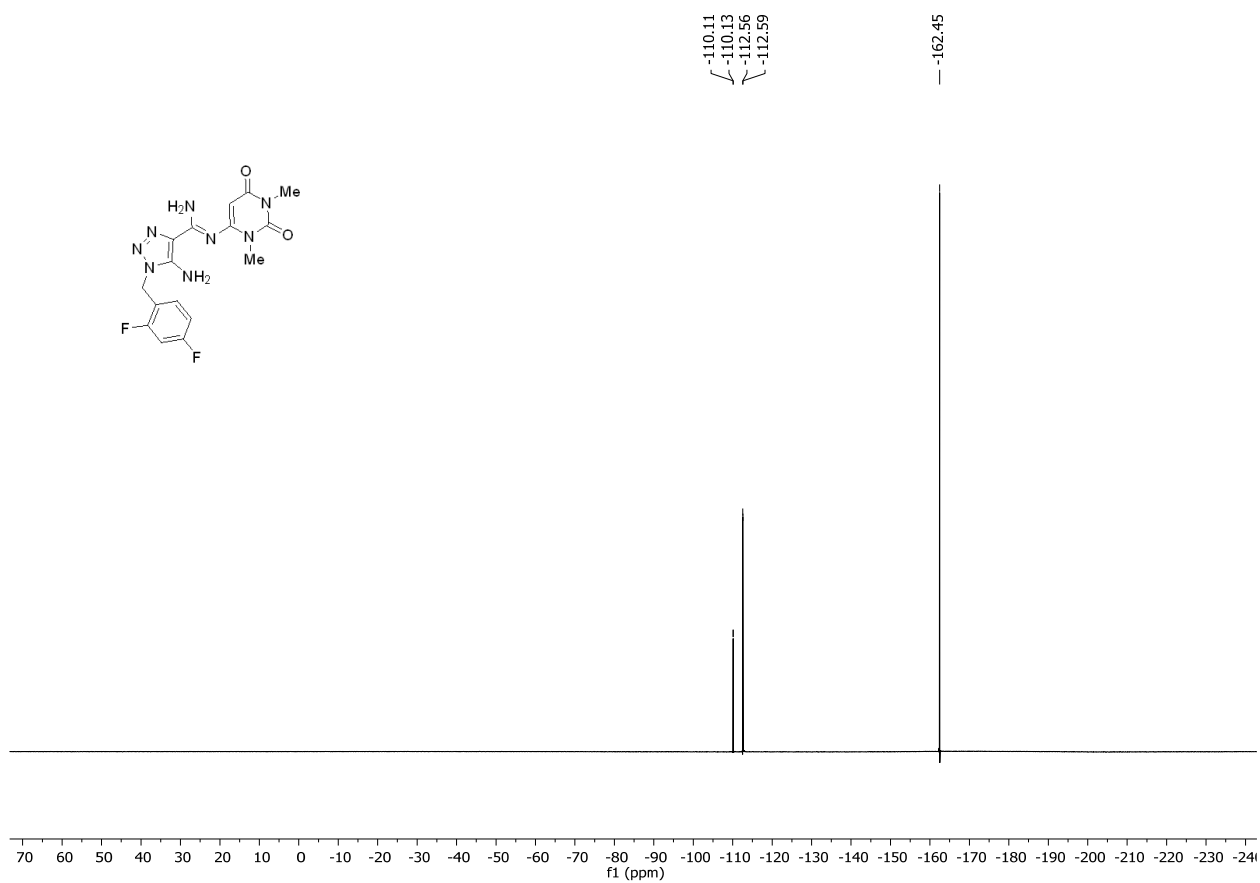

**Fig. S6.**  $^1\text{H}$  NMR spectrum (DMSO- $d_6$ ) of **3c**

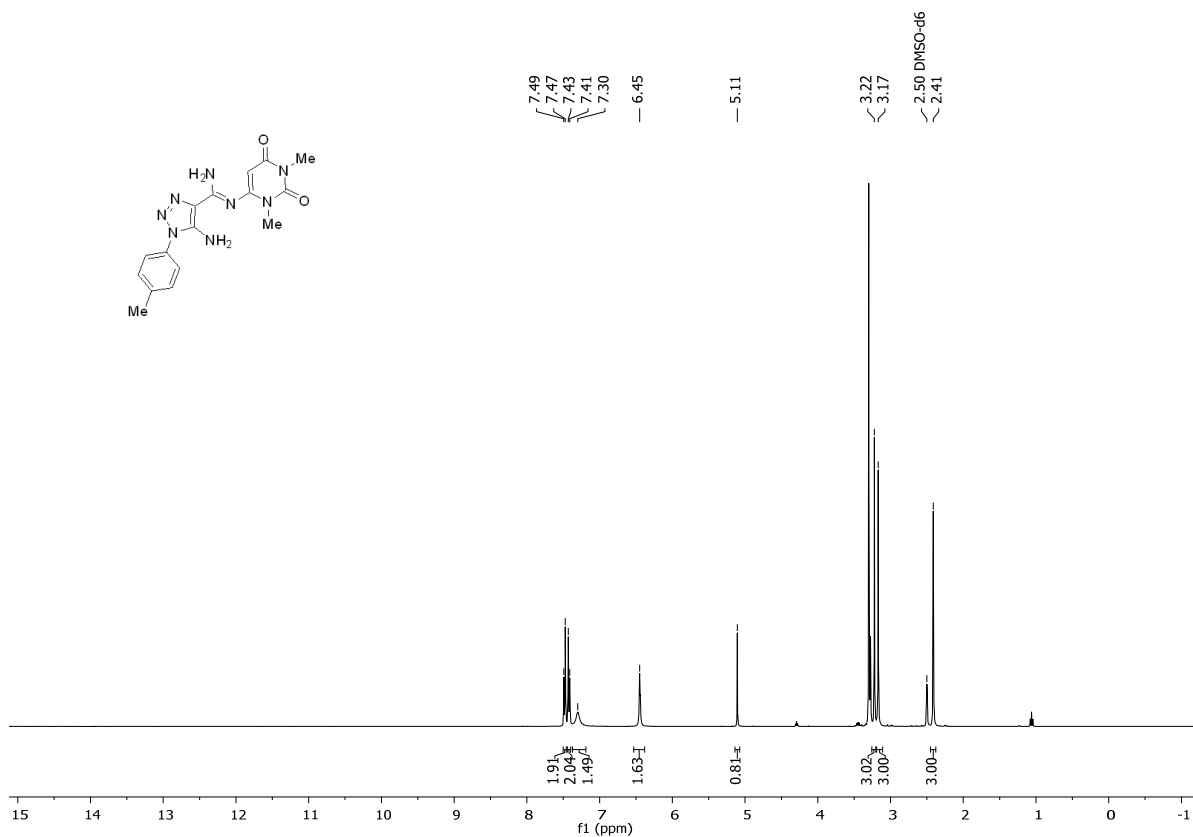

**Fig. S7.**  $^{13}\text{C}$  NMR spectrum (DMSO- $d_6$ ) of **3c**

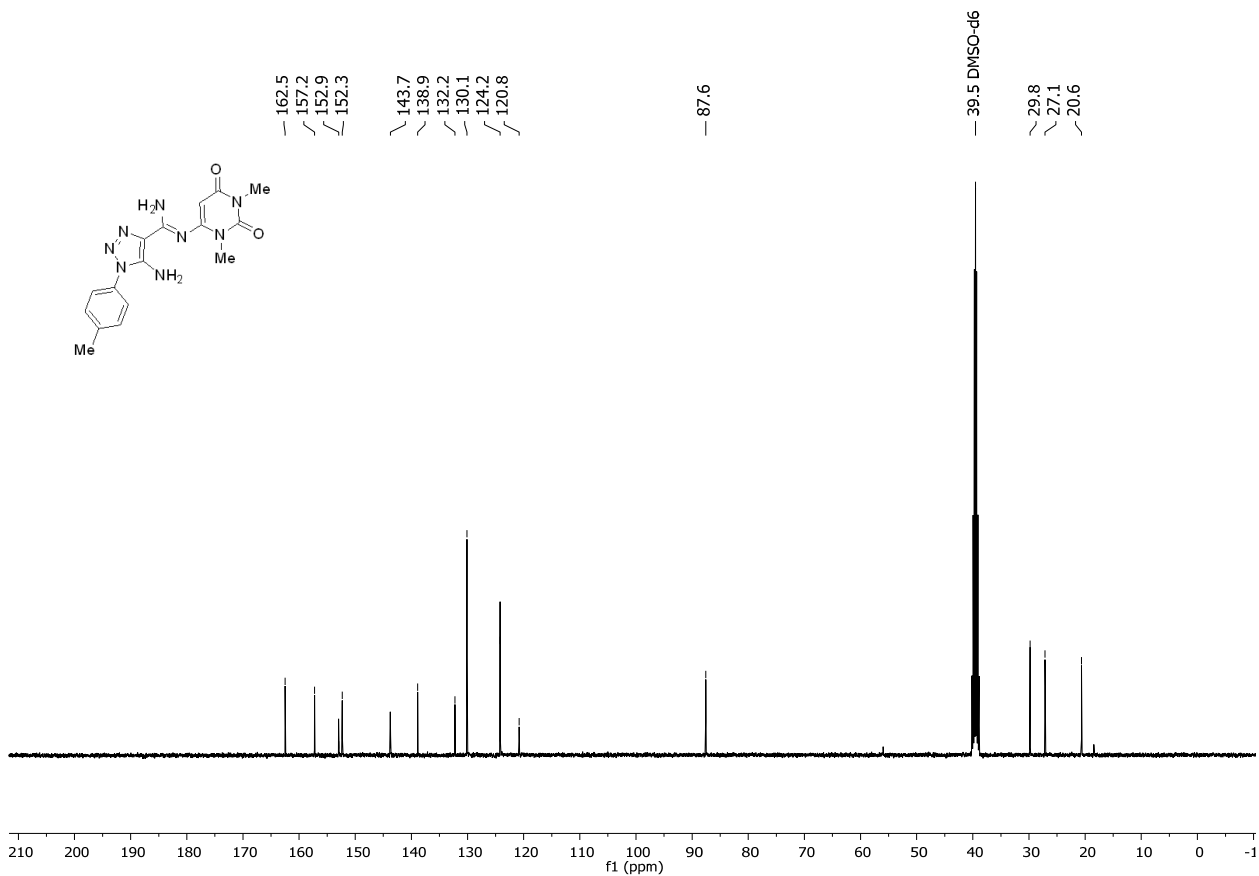

Fig. S8.  $^1\text{H}$  NMR spectrum (DMSO- $d_6$ ) of **3d**

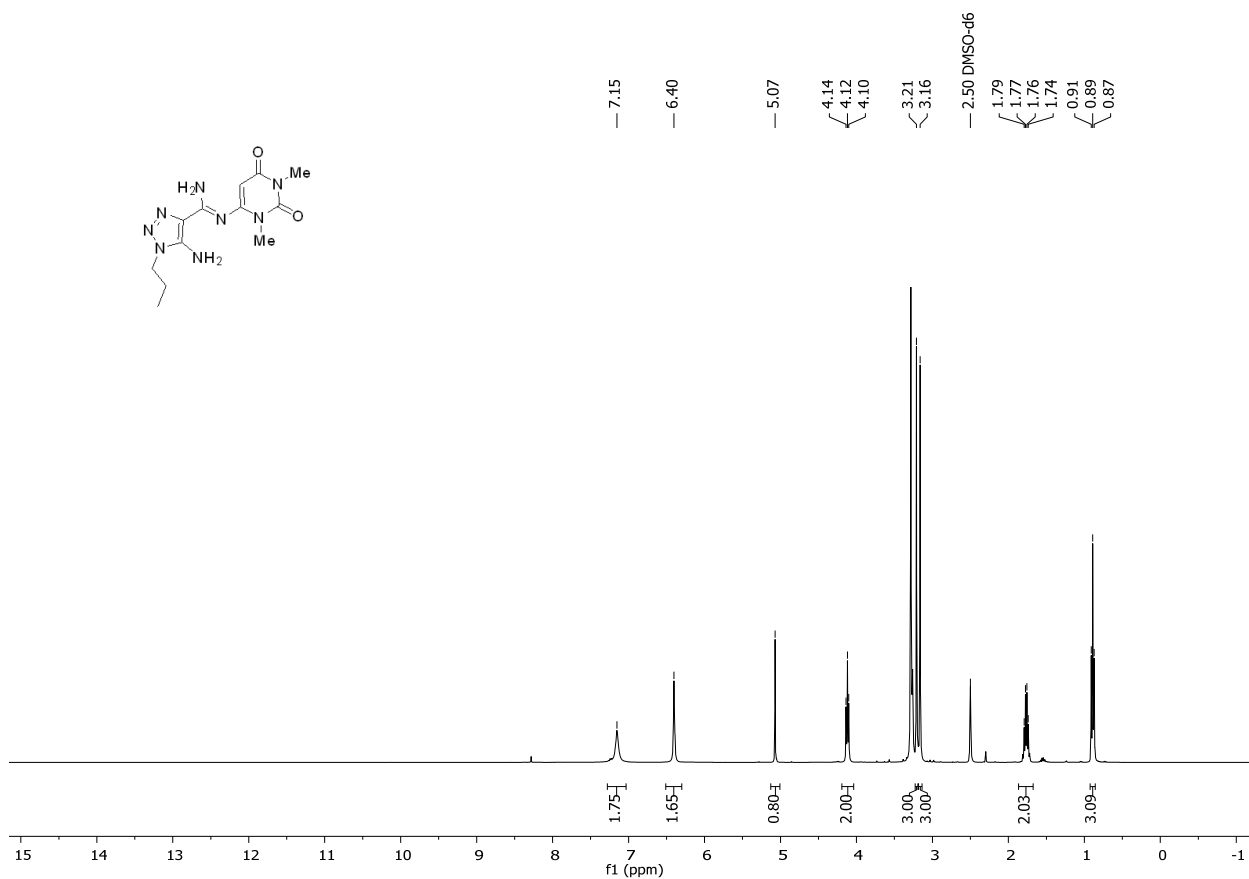

Fig. S9.  $^{13}\text{C}$  NMR spectrum (DMSO- $d_6$ ) of **3d**

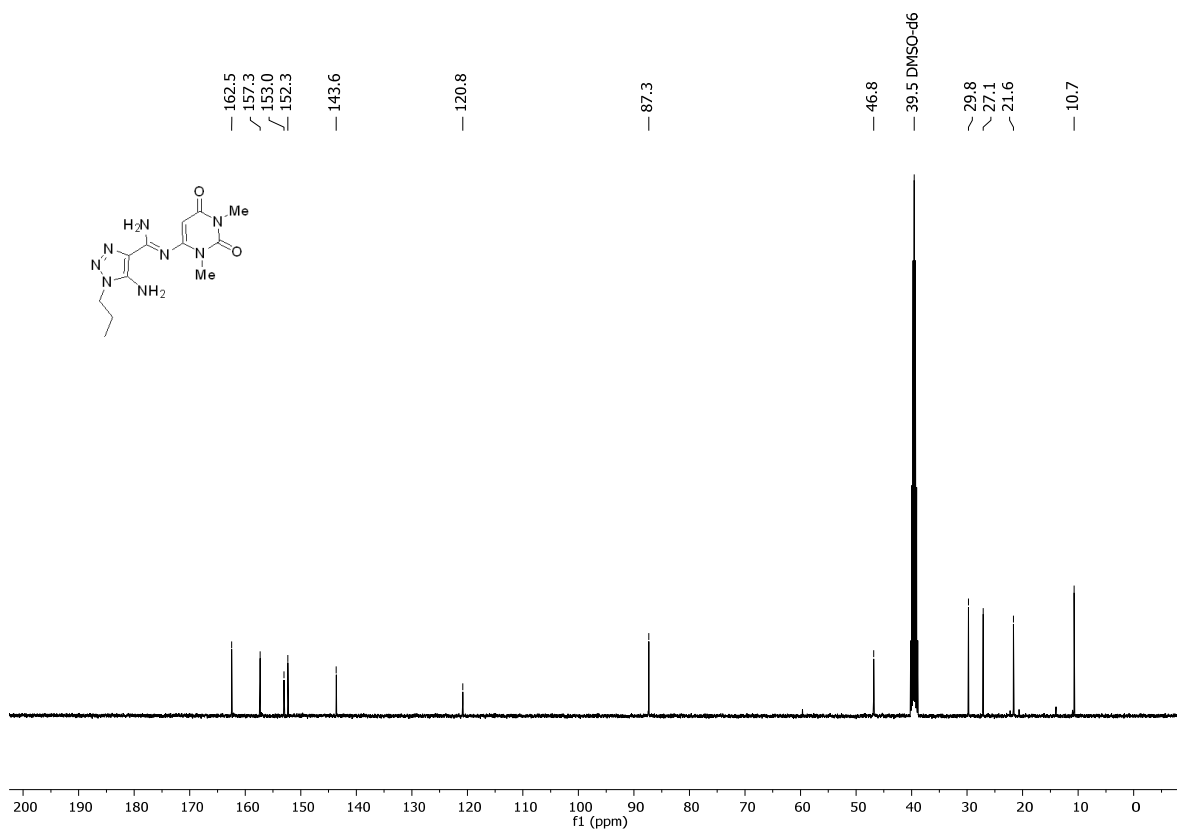

Fig. S10.  $^1\text{H}$  NMR spectrum (DMSO- $d_6$ ) of **3e**

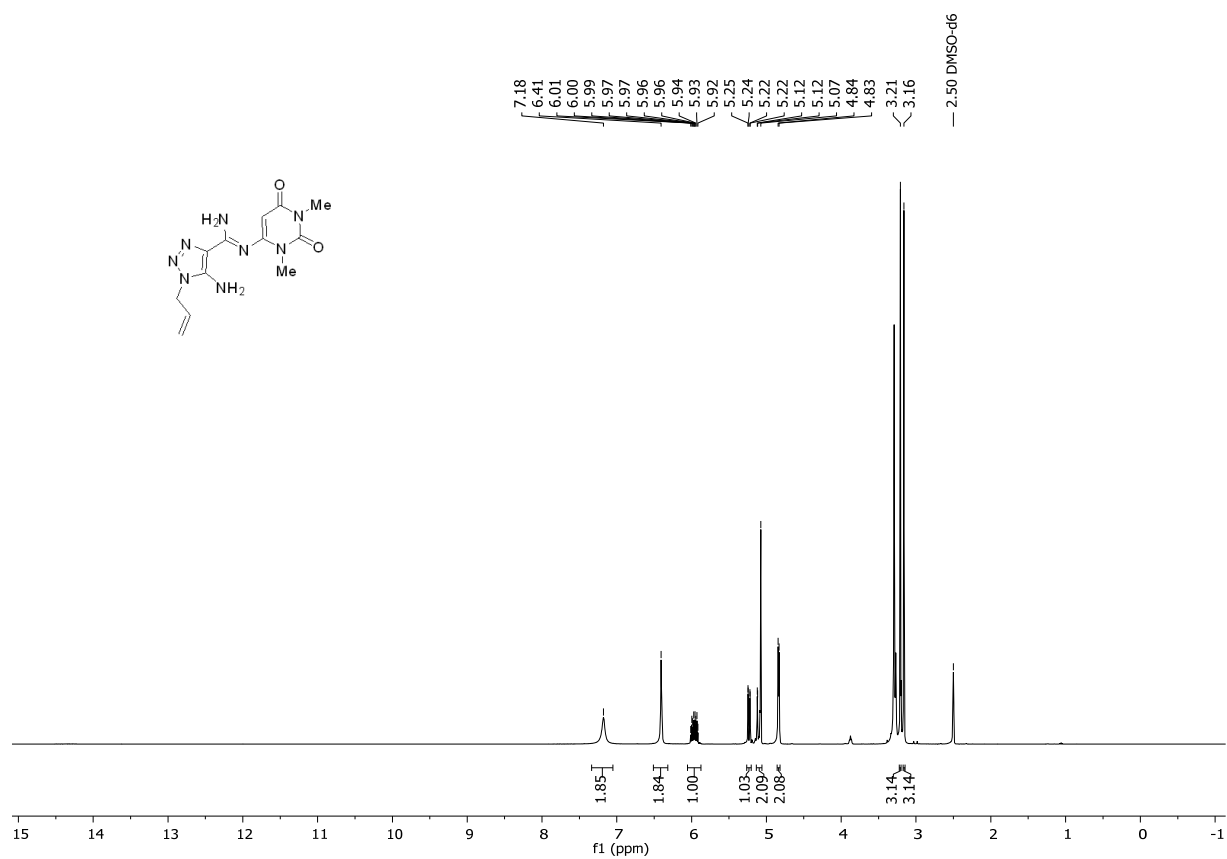

Fig. S11.  $^{13}\text{C}$  NMR spectrum (DMSO- $d_6$ ) of **3e**

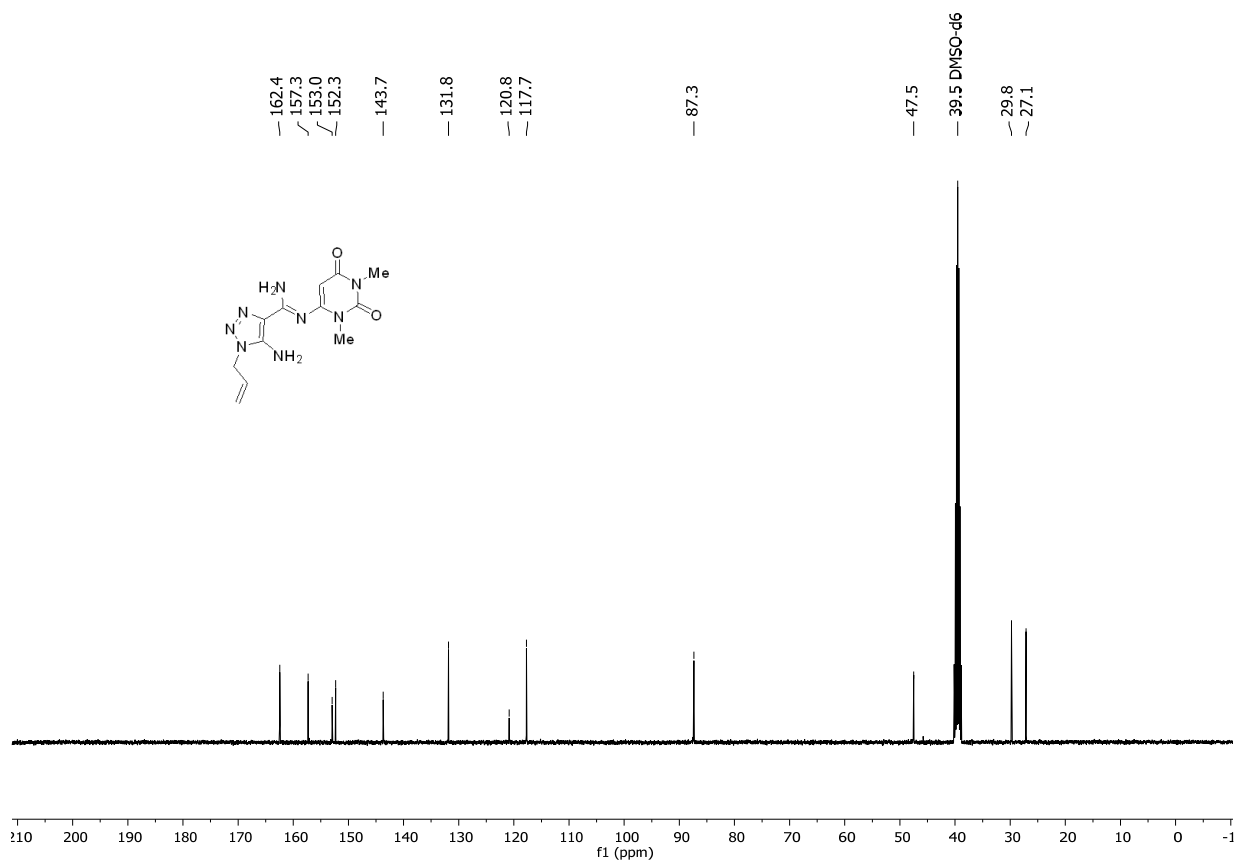



Fig. S12.  $^1\text{H}$  NMR spectrum (DMSO- $d_6$ ) of 3f

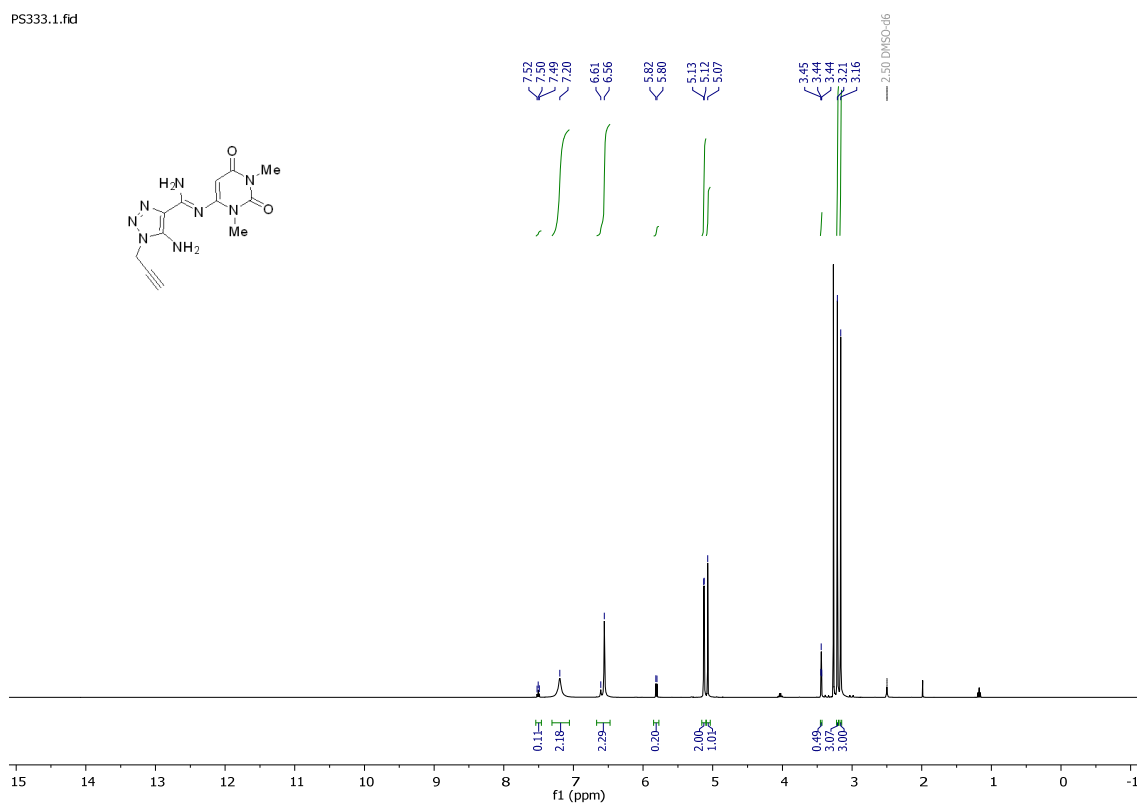

Fig. S13.  $^{13}\text{C}$  NMR spectrum (DMSO- $d_6$ ) of 3f

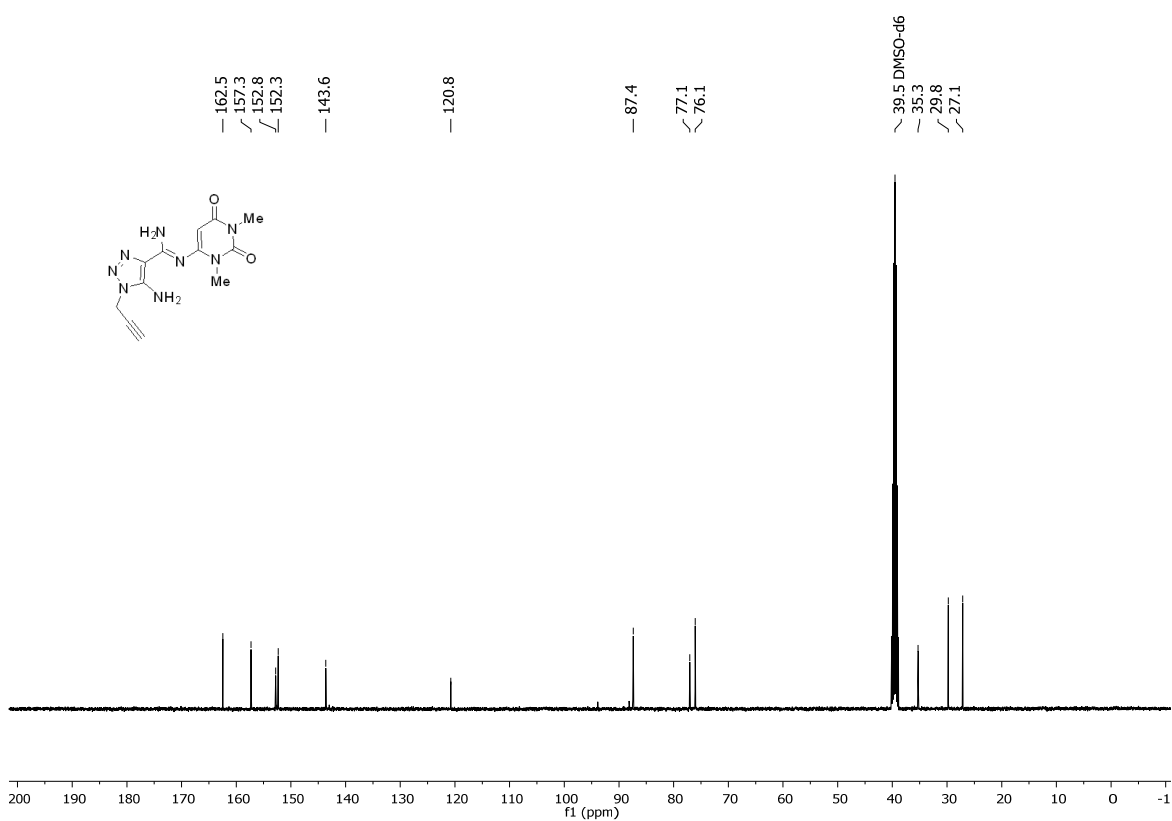

Fig. S14.  $^1\text{H}$  NMR spectrum (DMSO- $d_6$ ) of **3g**

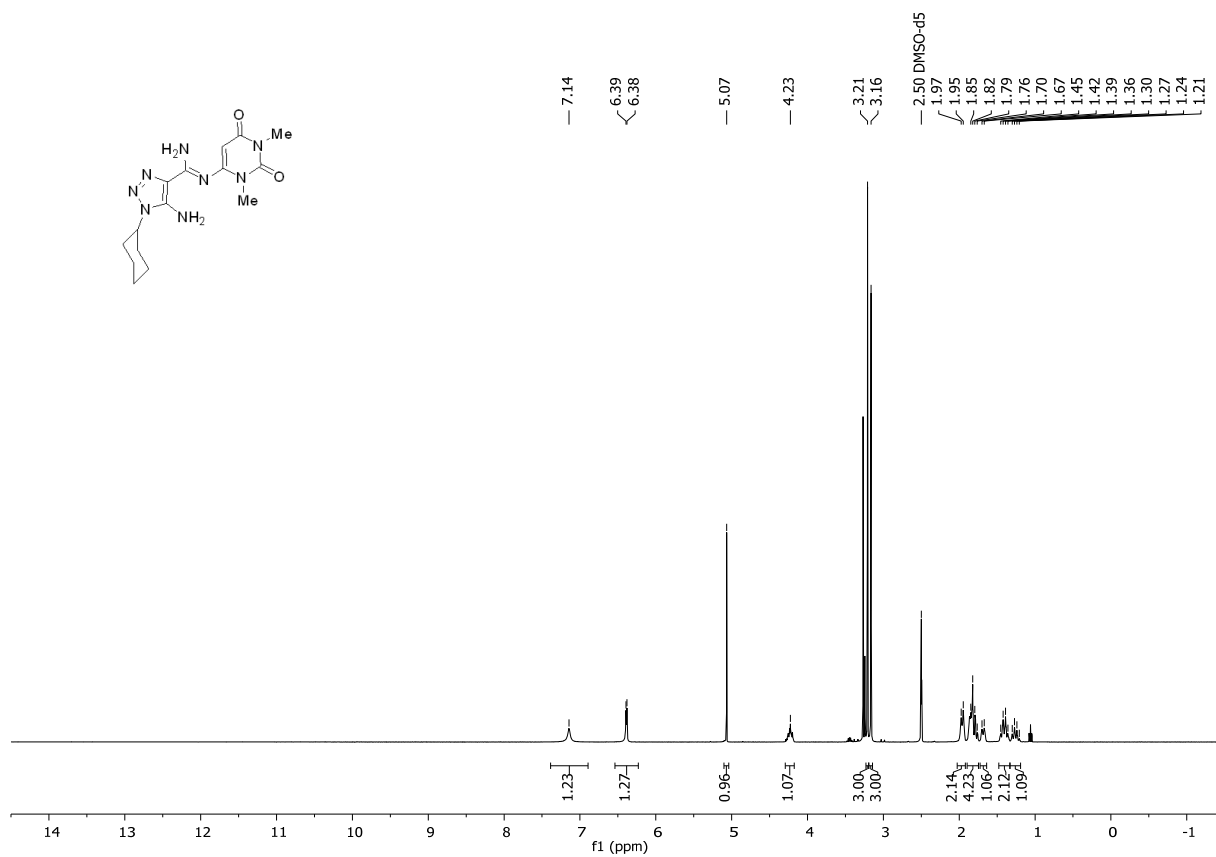

Fig. S15.  $^{13}\text{C}$  NMR spectrum (DMSO- $d_6$ ) of **3g**

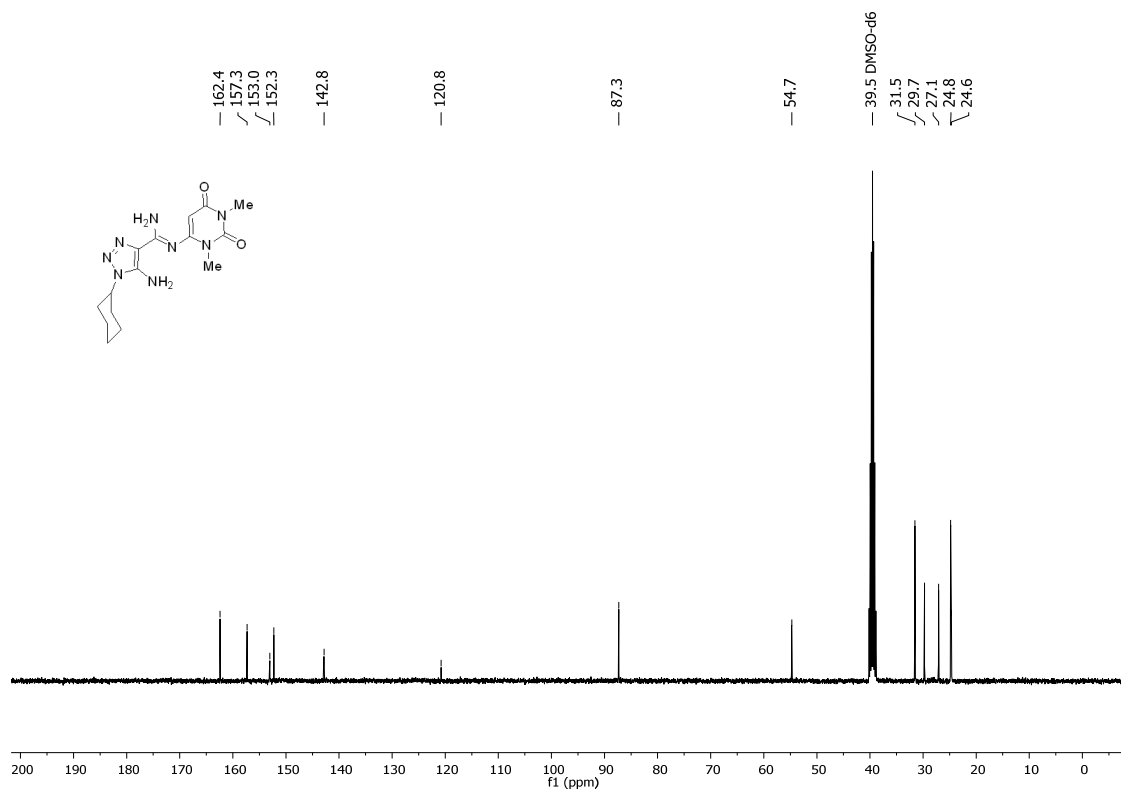

**Fig. S16.**  $^1\text{H}$  NMR spectrum (DMSO- $d_6$ ) of **3h**

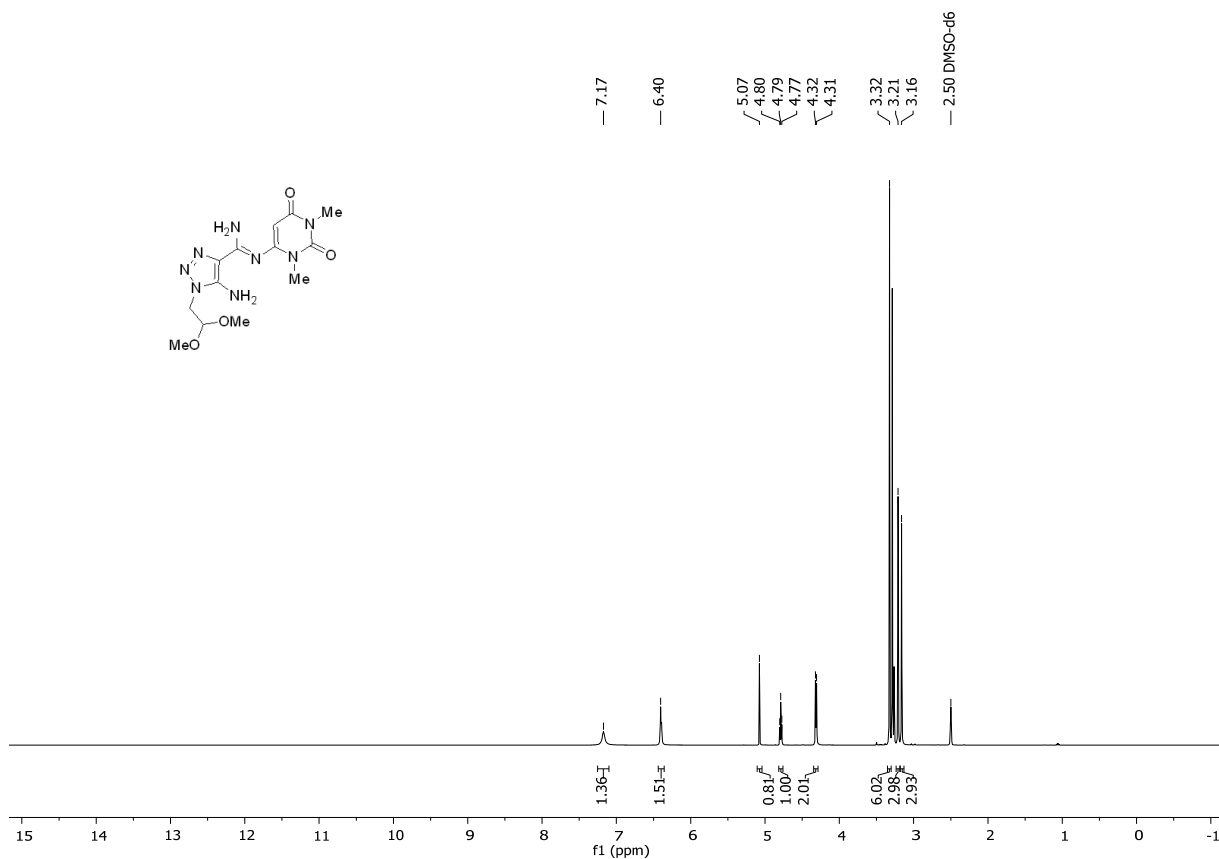

**Fig. S17.**  $^{13}\text{C}$  NMR spectrum (DMSO- $d_6$ ) of **3h**

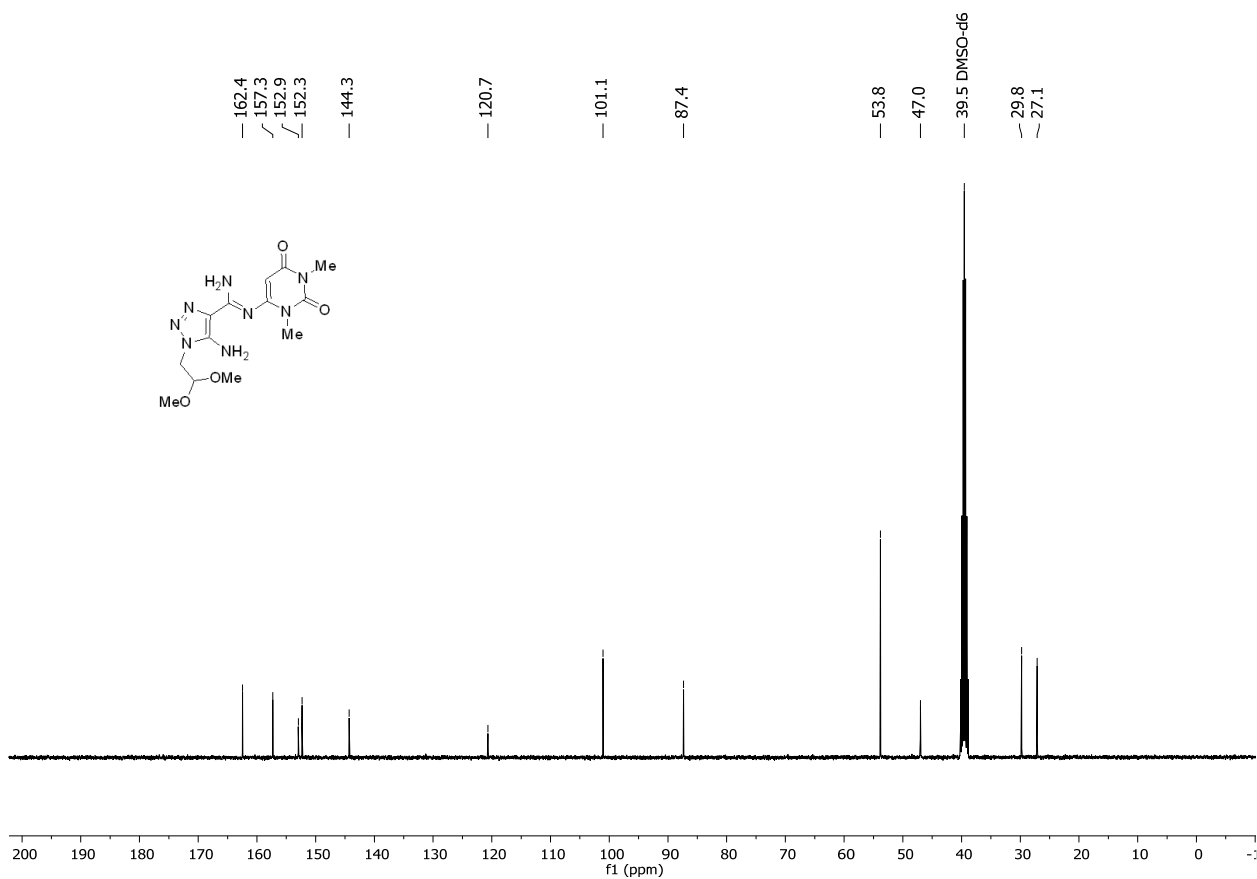

Fig. S18.  $^1\text{H}$  NMR spectrum (DMSO- $d_6$ ) of 3i

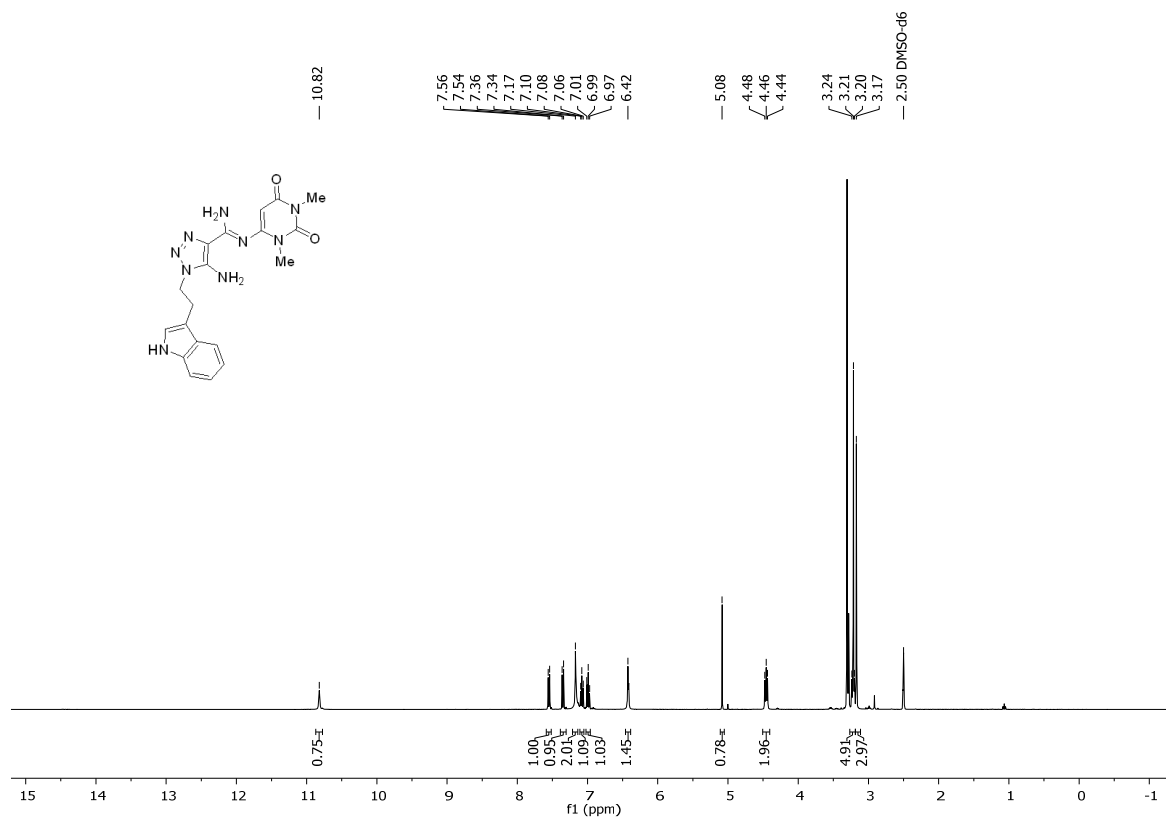

Fig. S19.  $^{13}\text{C}$  NMR spectrum (DMSO- $d_6$ ) of 3i

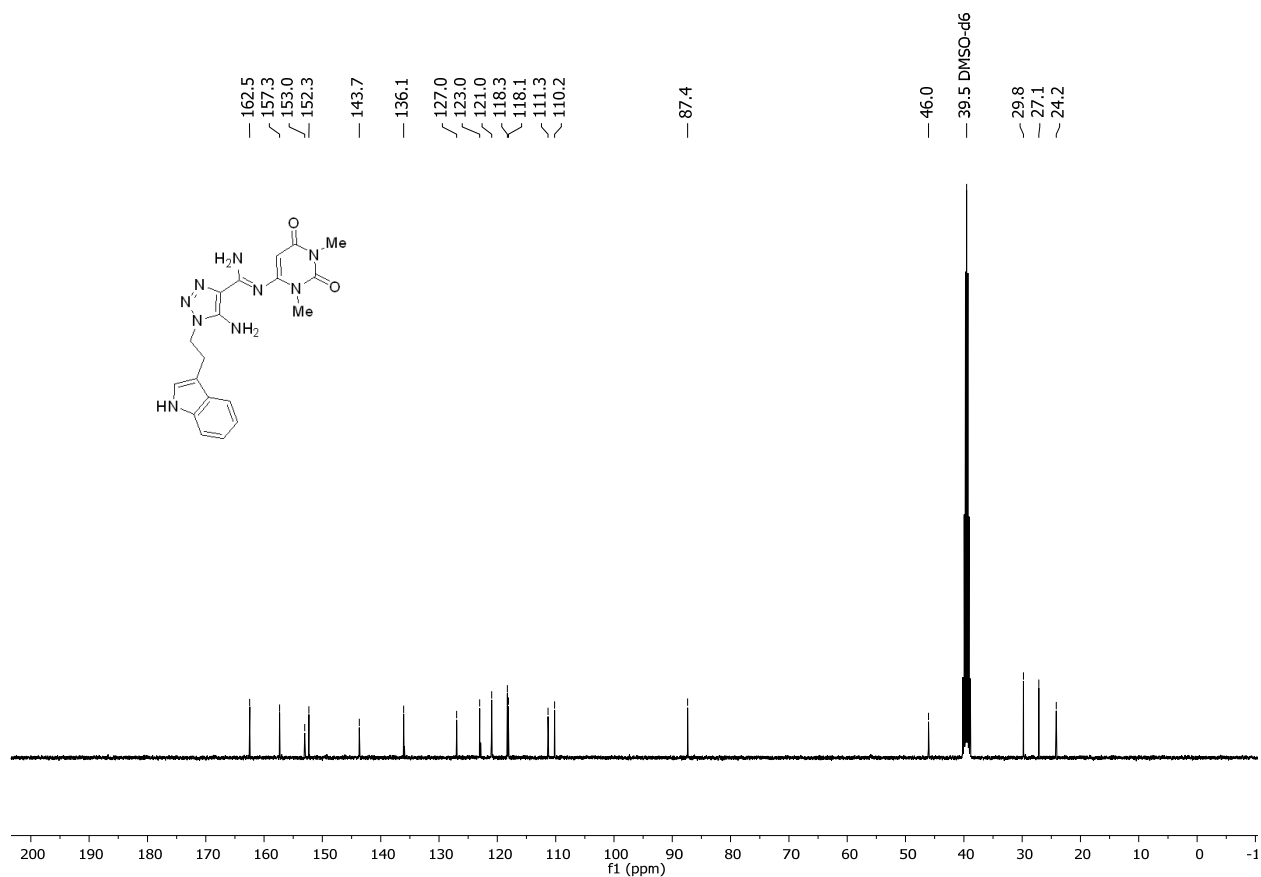

**Fig. 19A.** HMBC spectrum (DMSO-d<sub>6</sub>) of **3r**

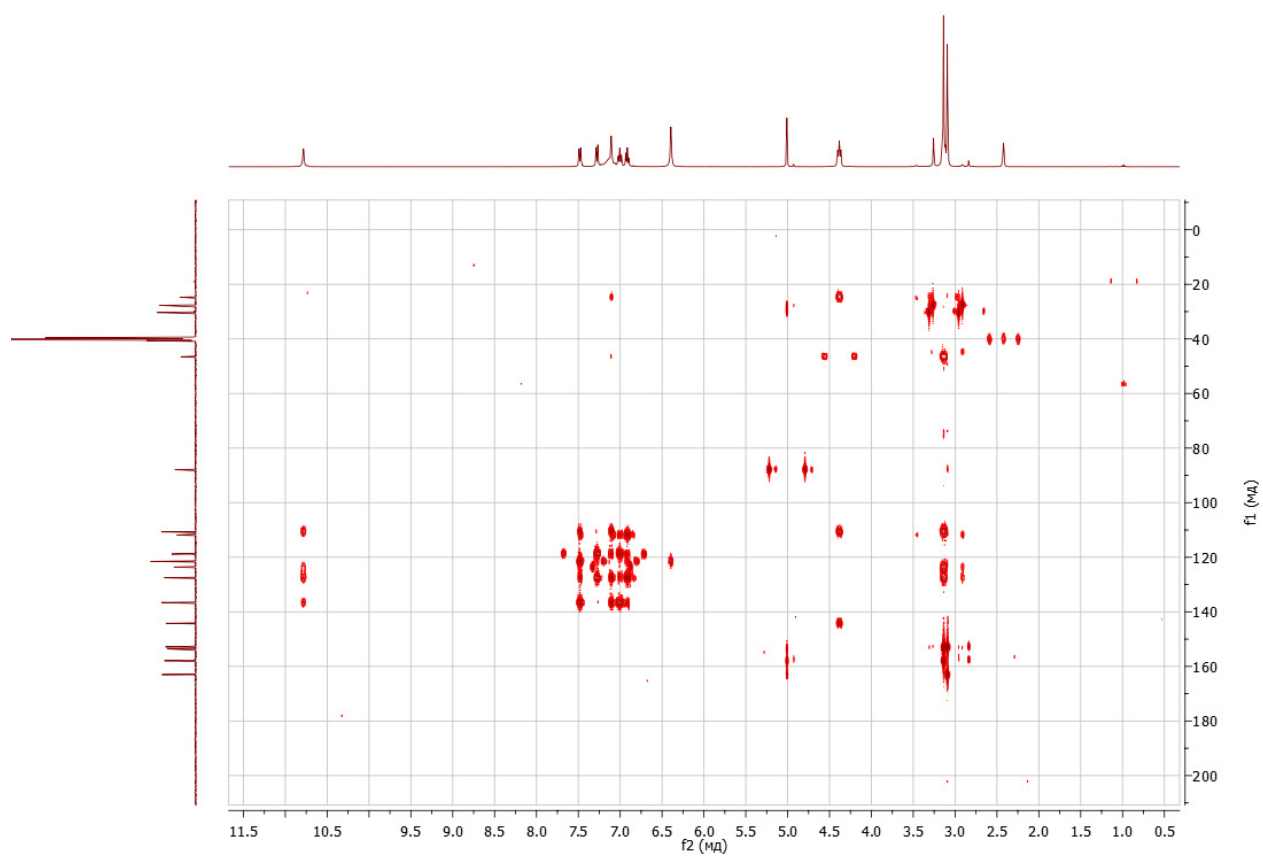

Fig. S20.  $^1\text{H}$  NMR spectrum (DMSO- $d_6$ ) of **3j**

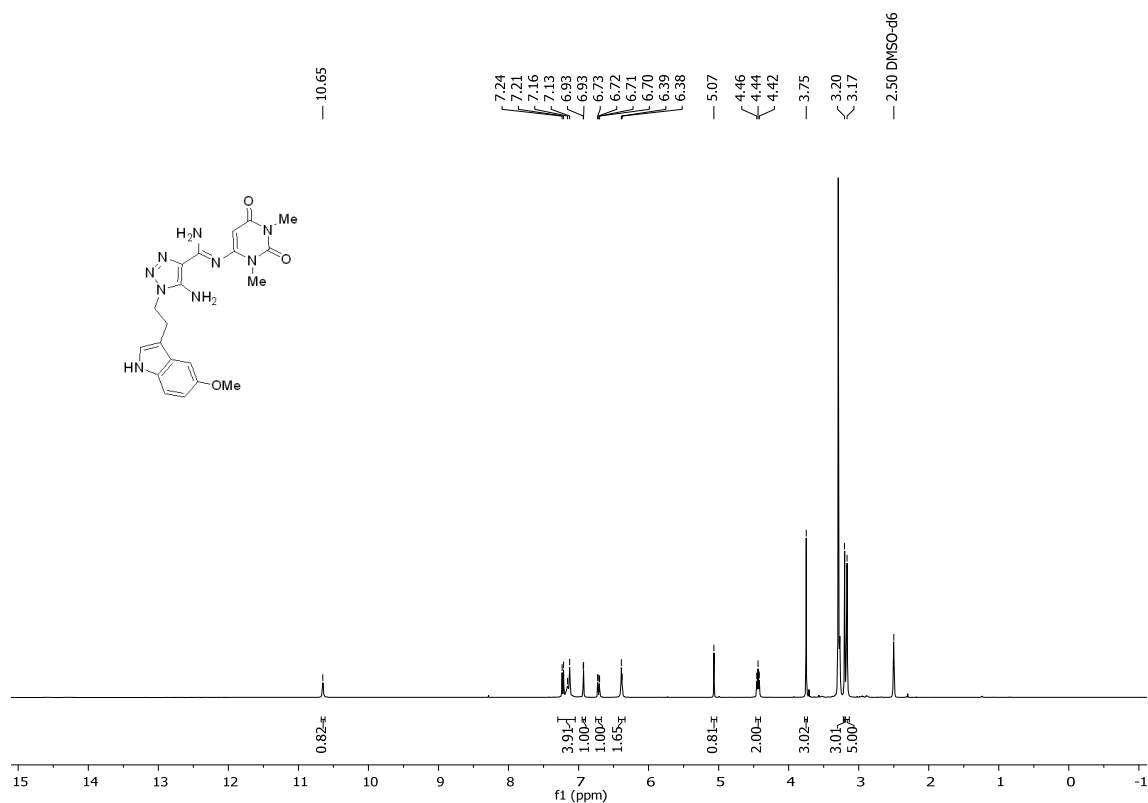

Fig. S21.  $^{13}\text{C}$  NMR spectrum (DMSO- $d_6$ ) of **3j**

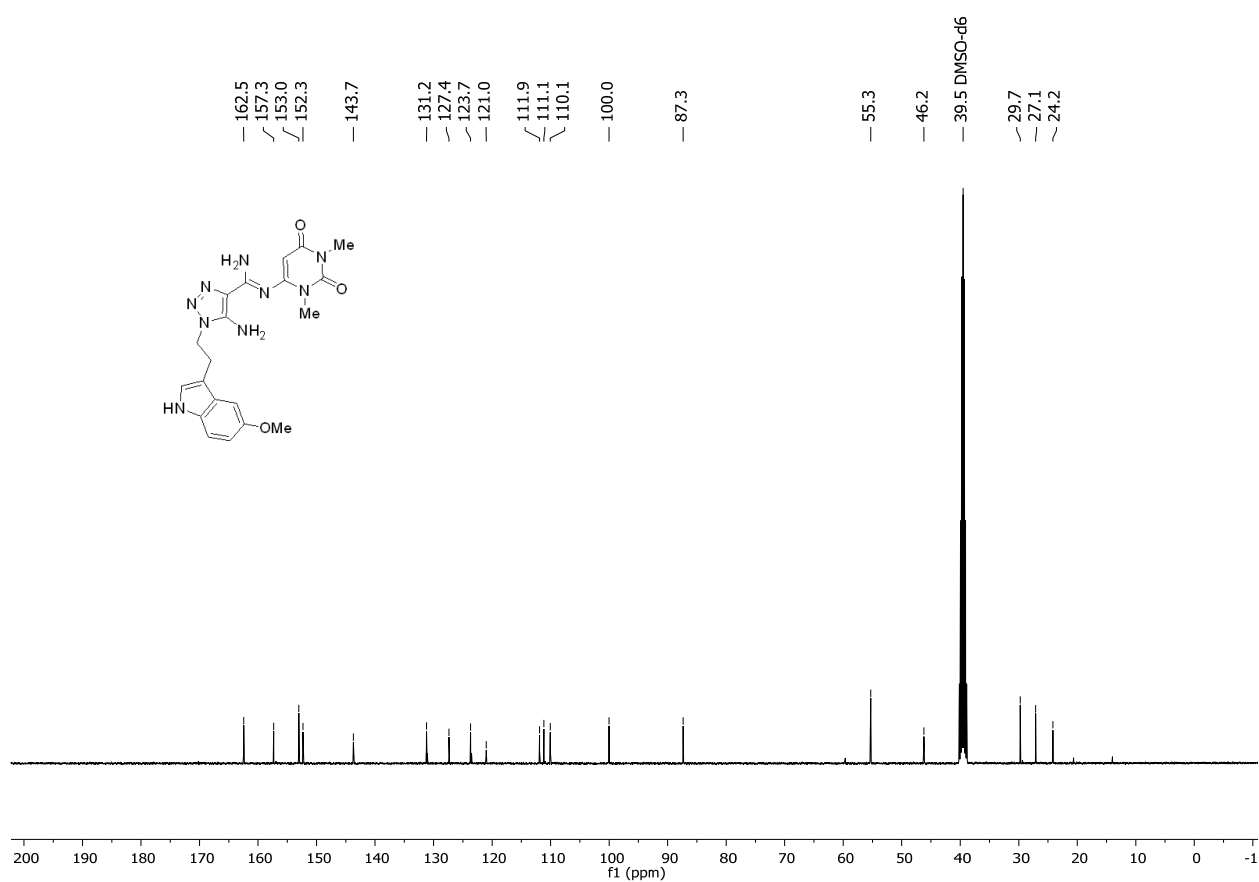

Fig. S22.  $^1\text{H}$  NMR spectrum (DMSO- $d_6$ ) of 3k

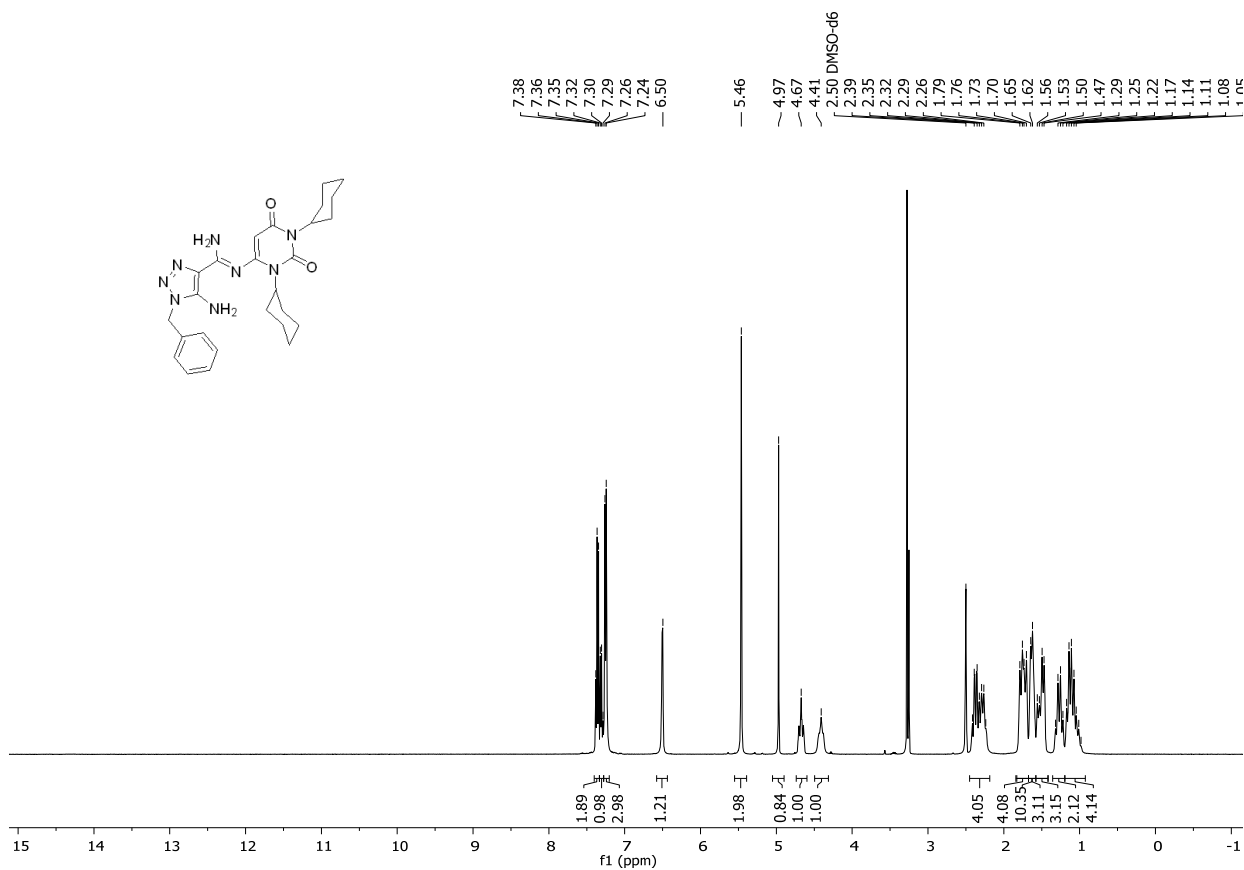

Fig. S23.  $^{13}\text{C}$  NMR spectrum (DMSO- $d_6$ ) of 3k

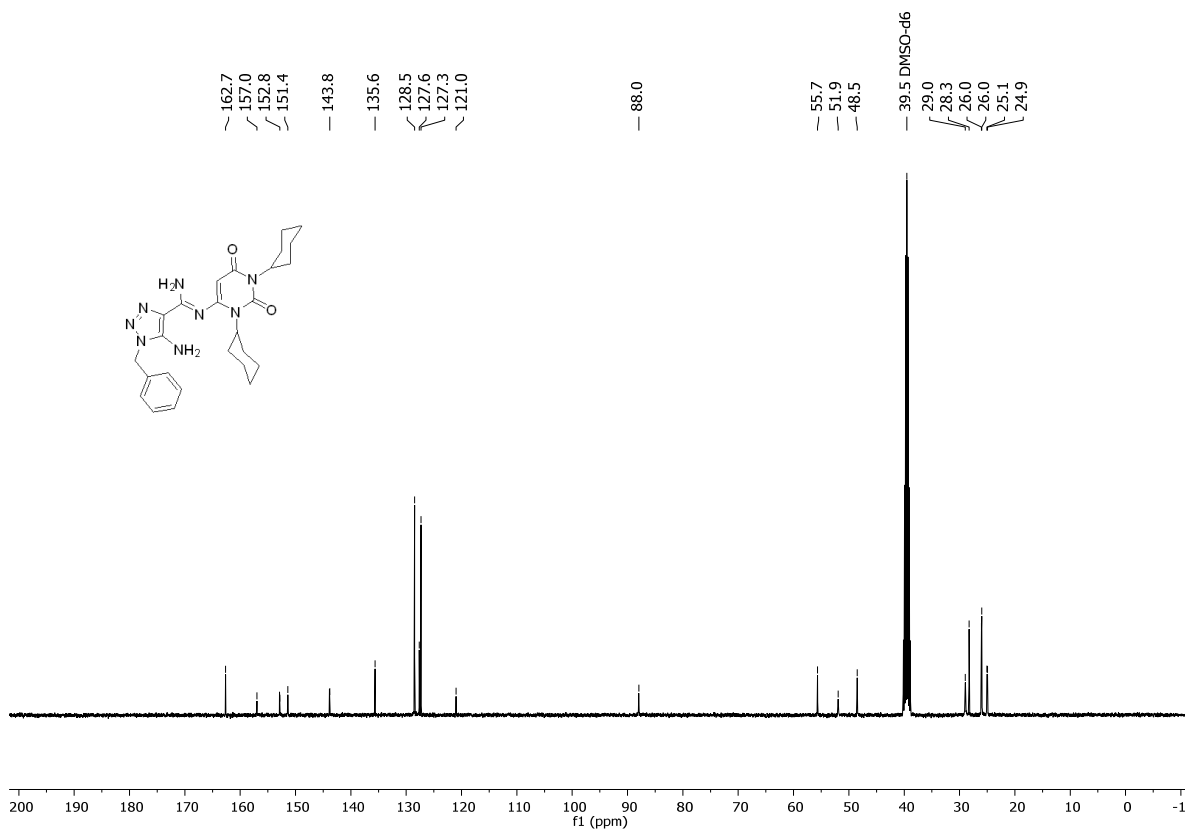

Fig. 23A. HMBC spectrum (DMSO-d<sub>6</sub>) of **3k**

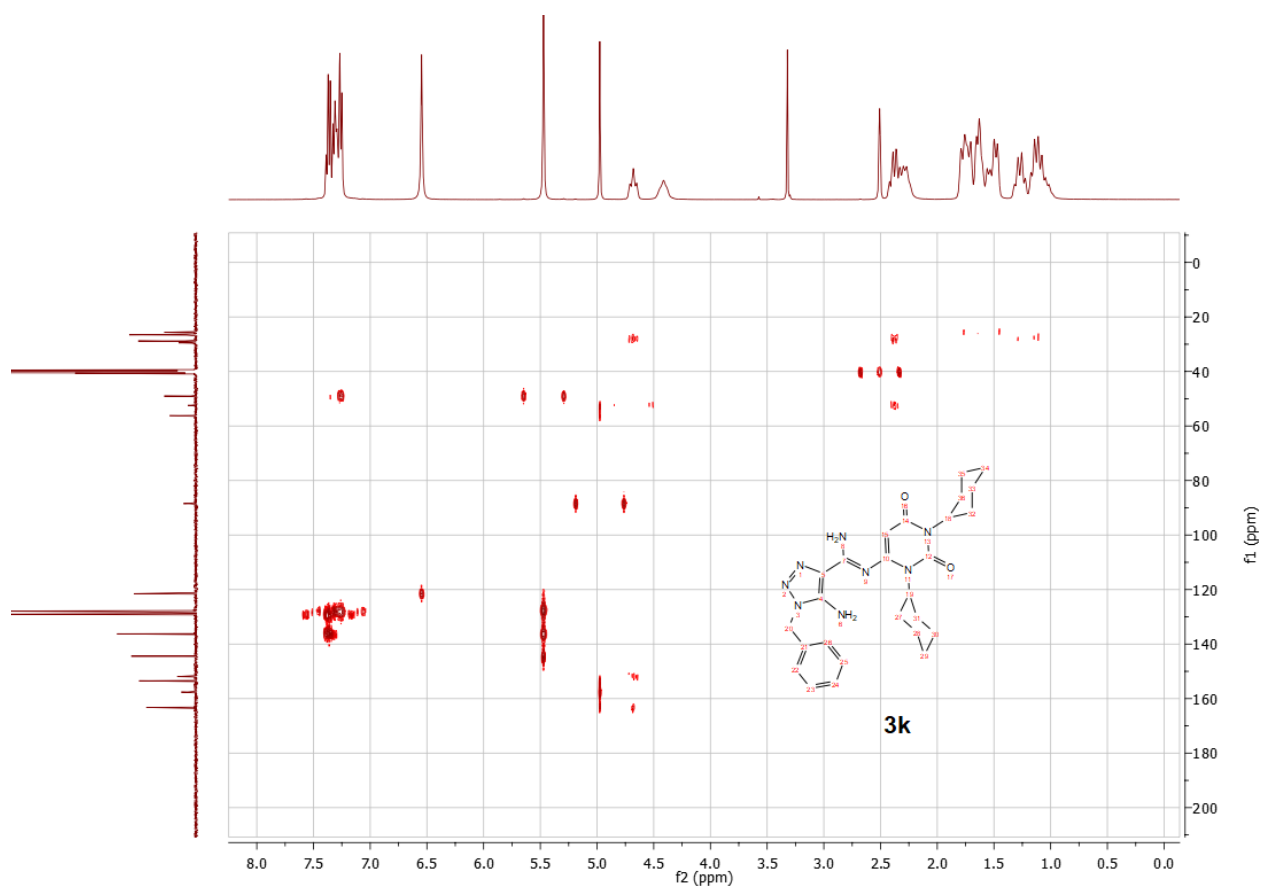



Fig. S24.  $^1\text{H}$  NMR spectrum (DMSO- $d_6$ ) of 31

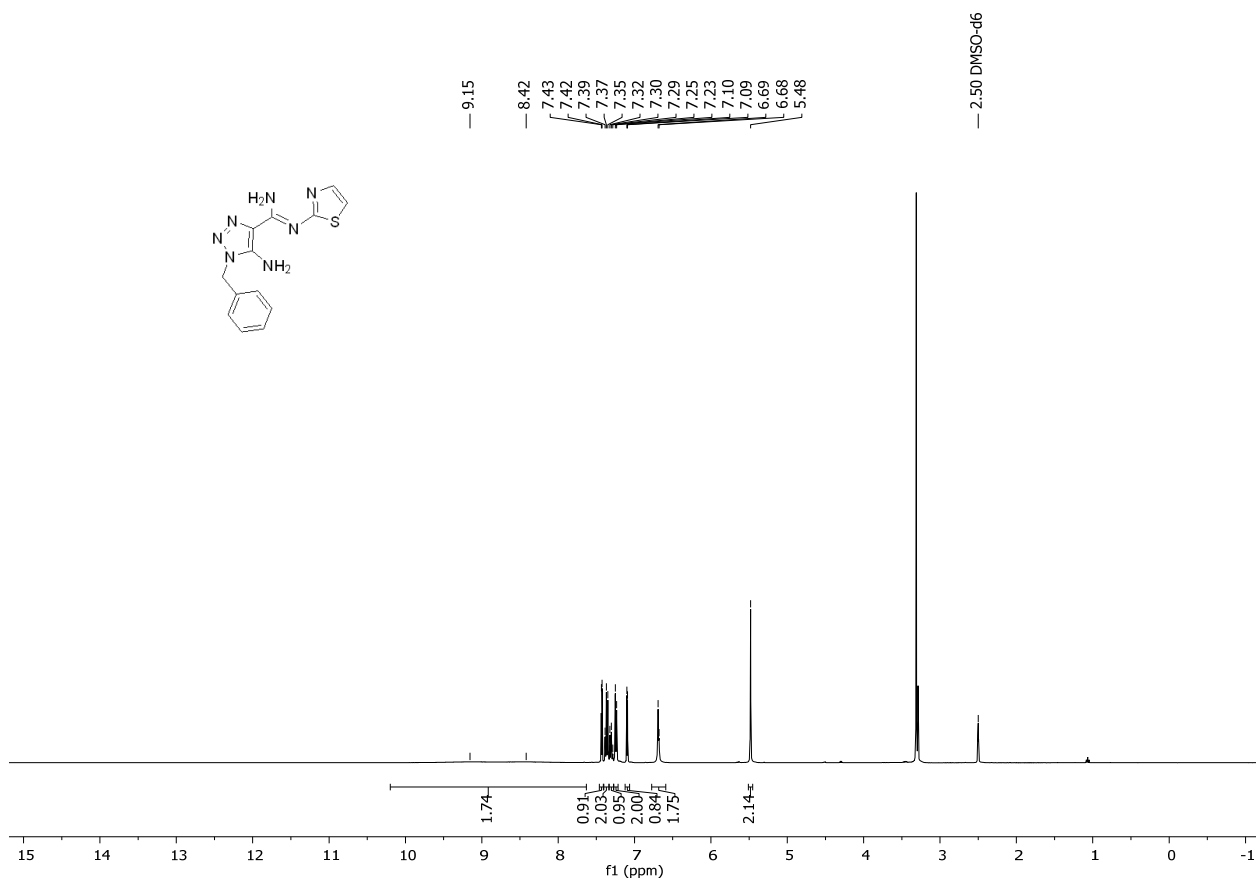

Fig. S25.  $^{13}\text{C}$  NMR spectrum (DMSO- $d_6$ ) of 31

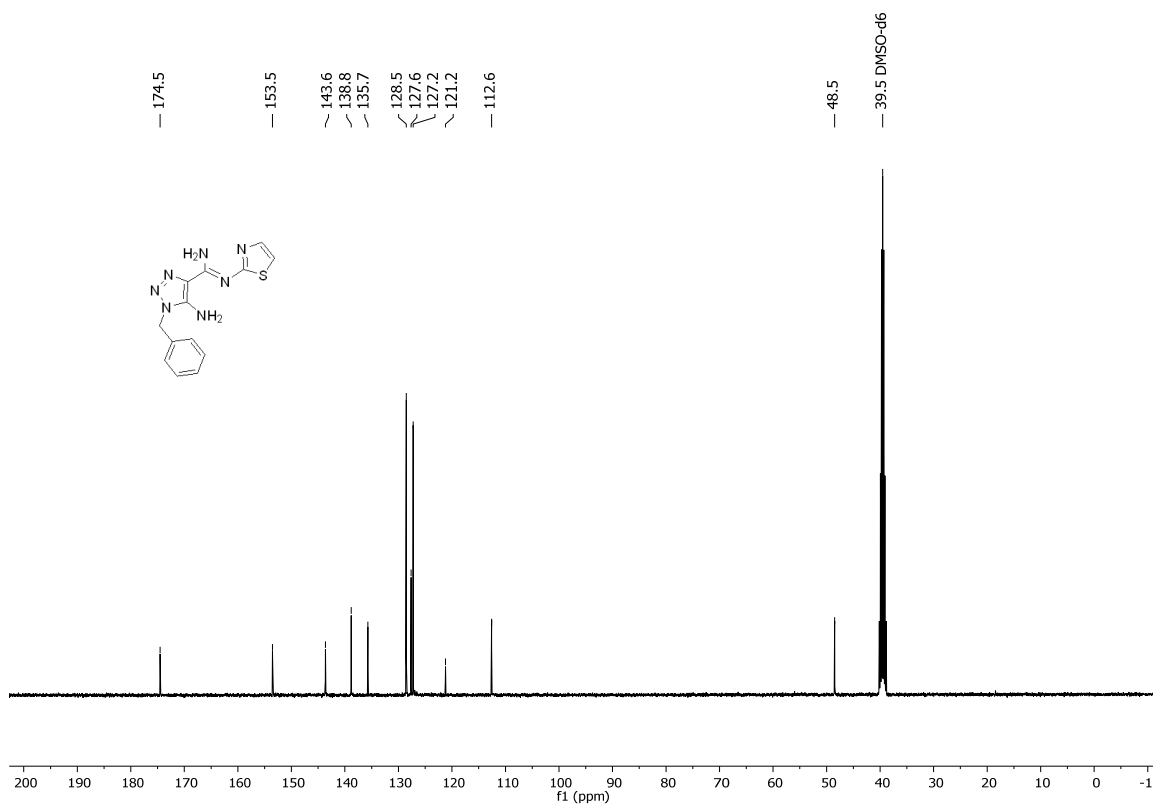

Fig. S26. <sup>1</sup>H NMR spectrum (DMSO-*d*<sub>6</sub>) of **3m**

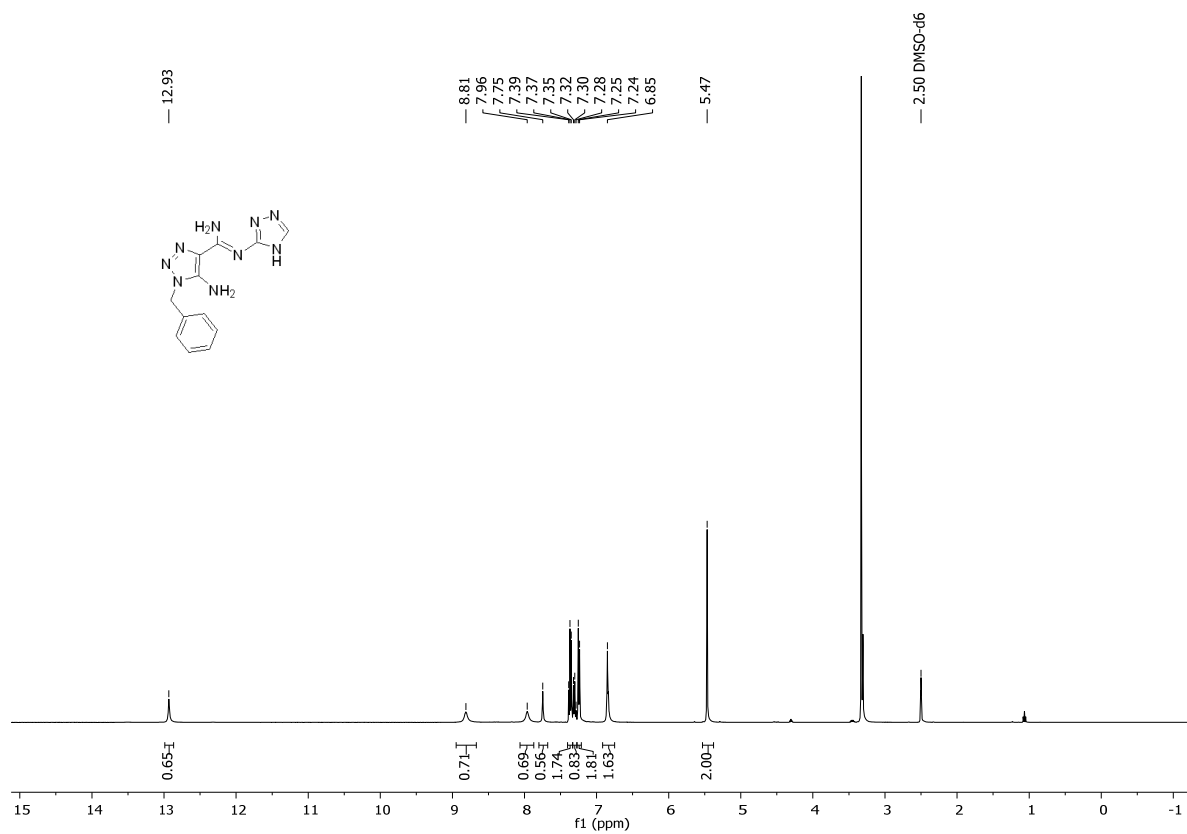

Fig. S27. <sup>13</sup>C NMR spectrum (DMSO-*d*<sub>6</sub>) of **3m**

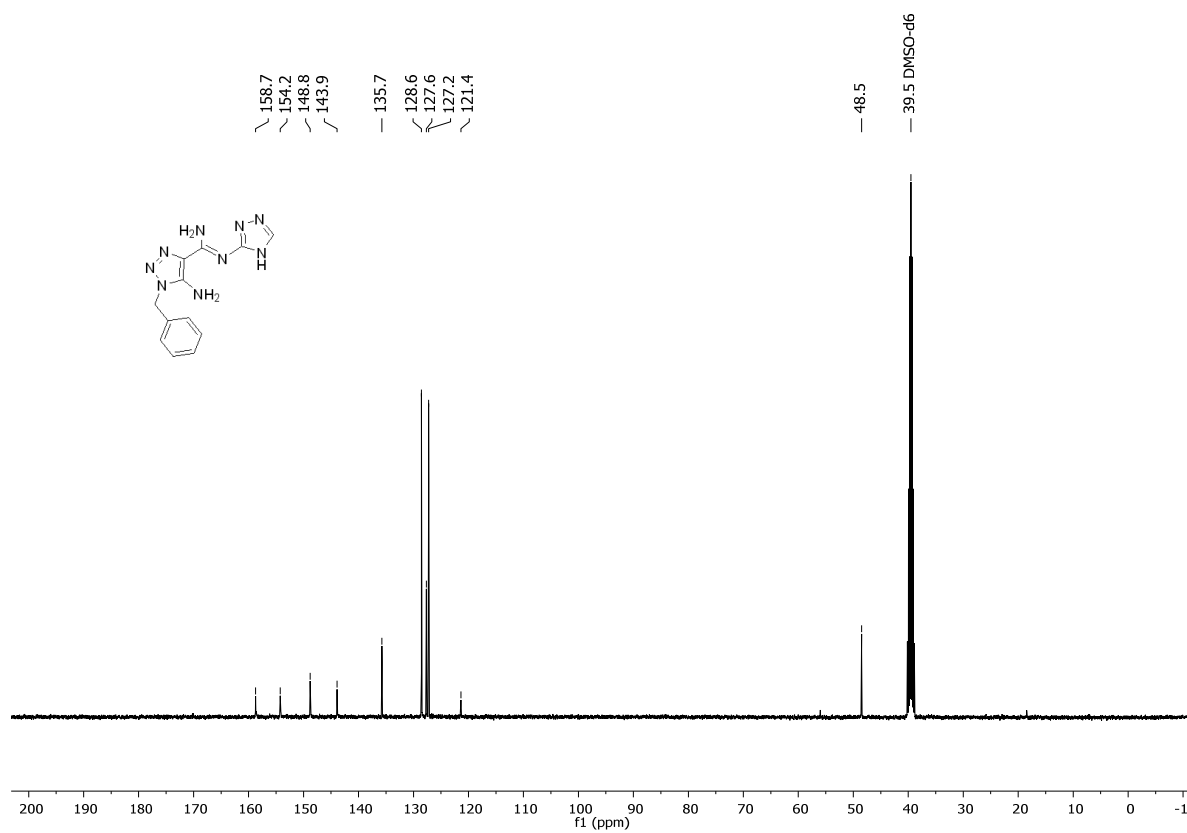

Fig. S28.  $^1\text{H}$  NMR spectrum (DMSO- $d_6$ ) of **3n**

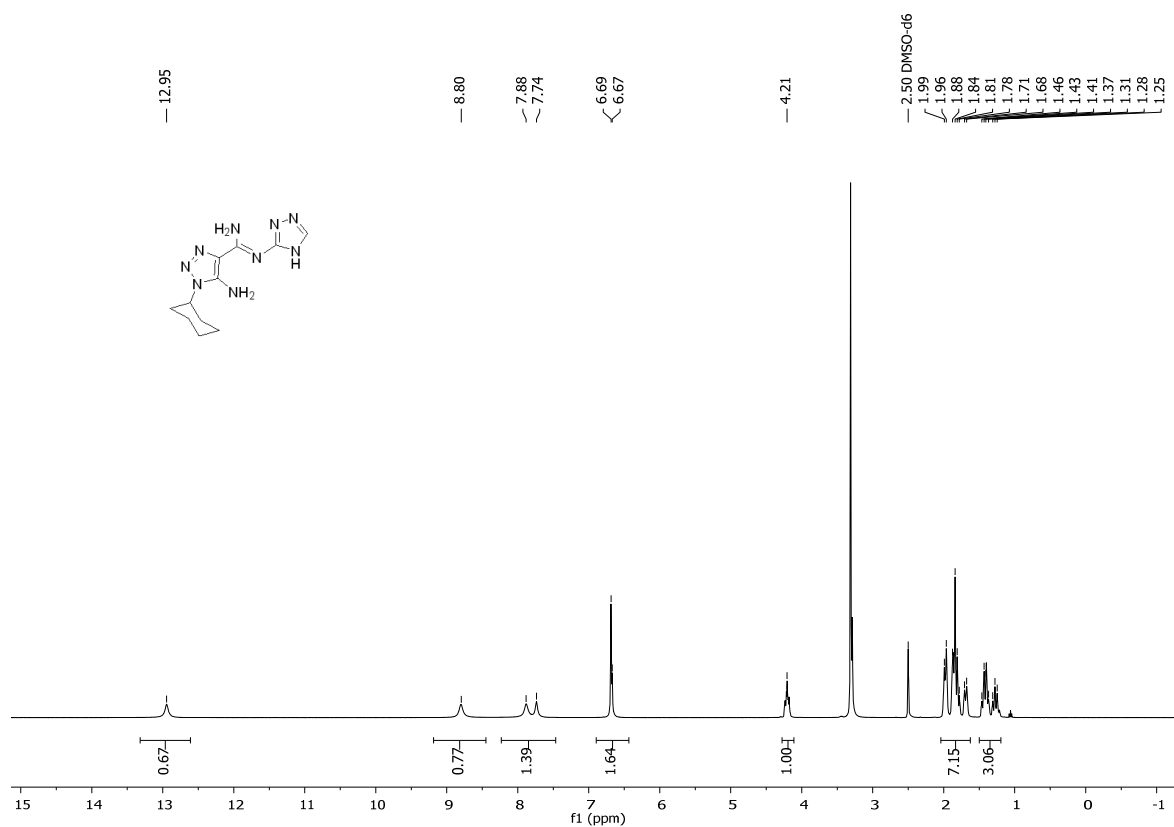

Fig. S29.  $^{13}\text{C}$  NMR spectrum (DMSO- $d_6$ ) of **3n**

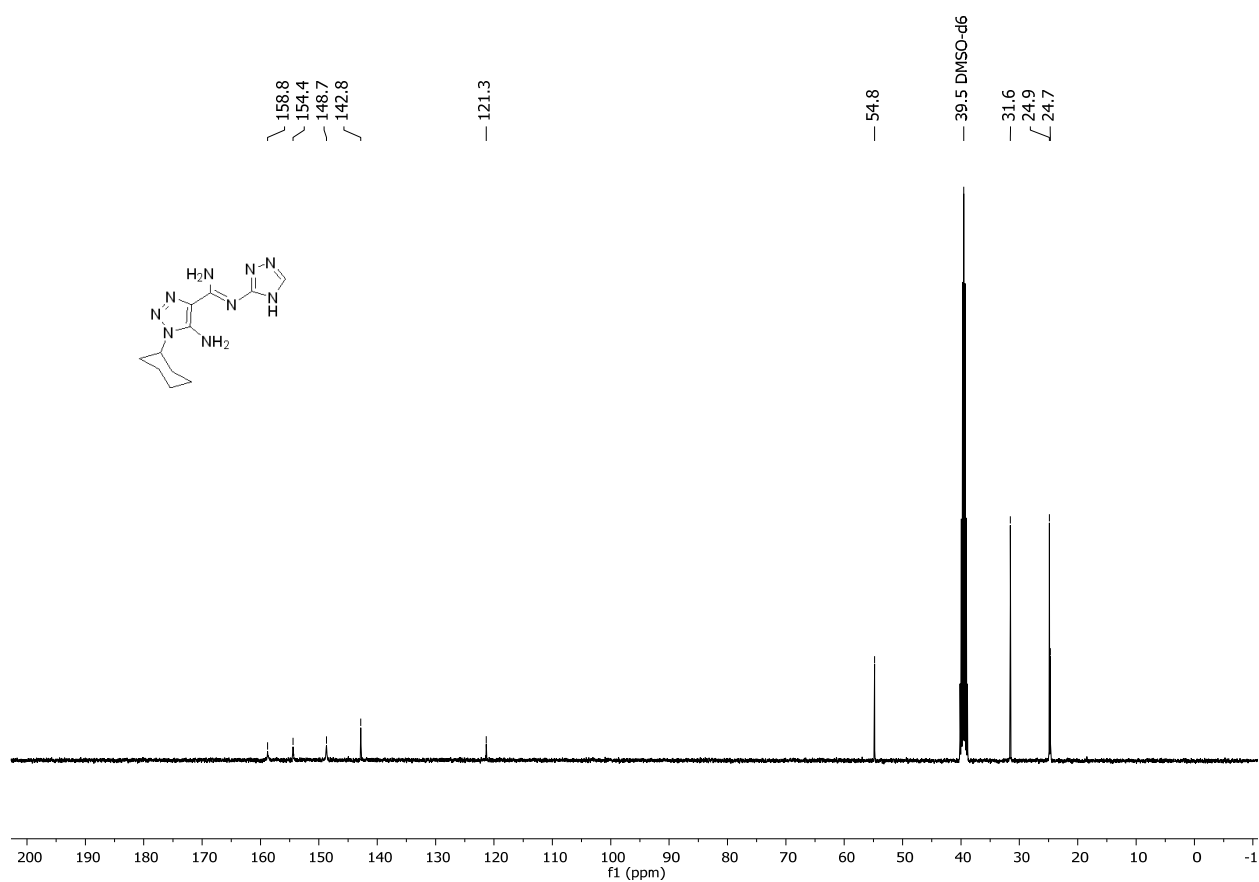

Fig. S30. <sup>1</sup>H NMR spectrum (DMSO-*d*<sub>6</sub>) of **30**

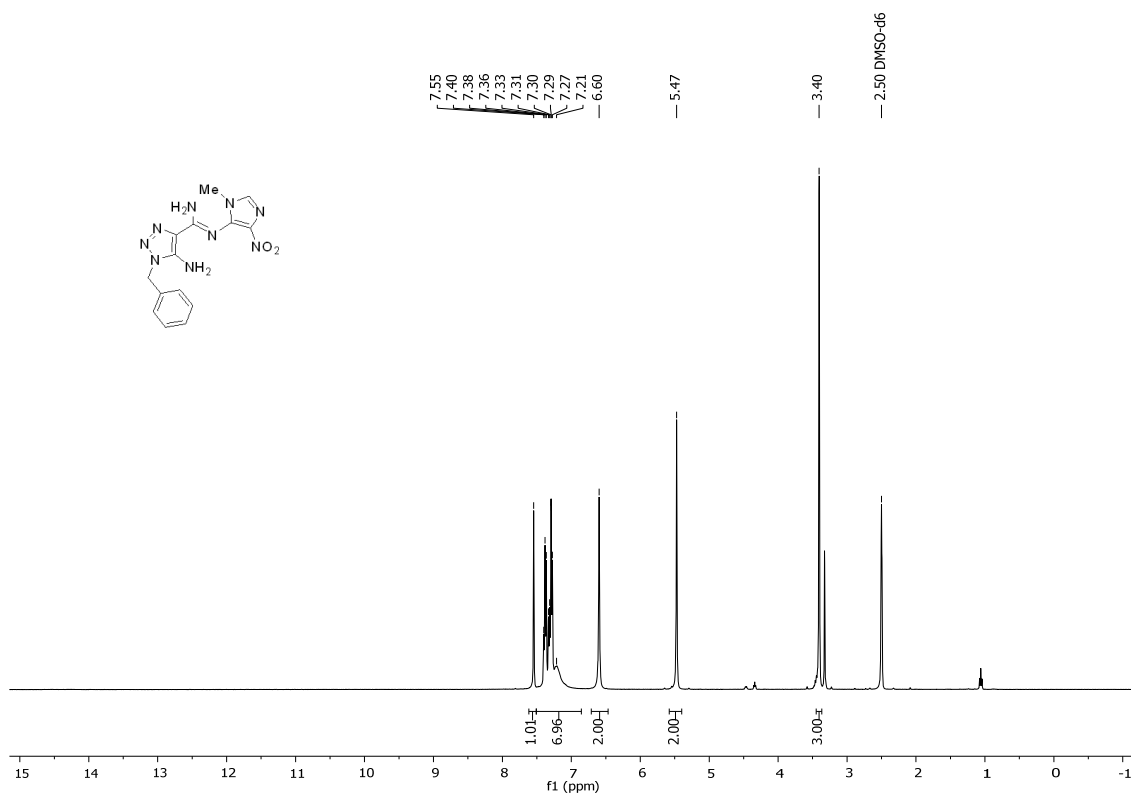

Fig. S31. <sup>13</sup>C NMR spectrum (DMSO-*d*<sub>6</sub>) of **30**

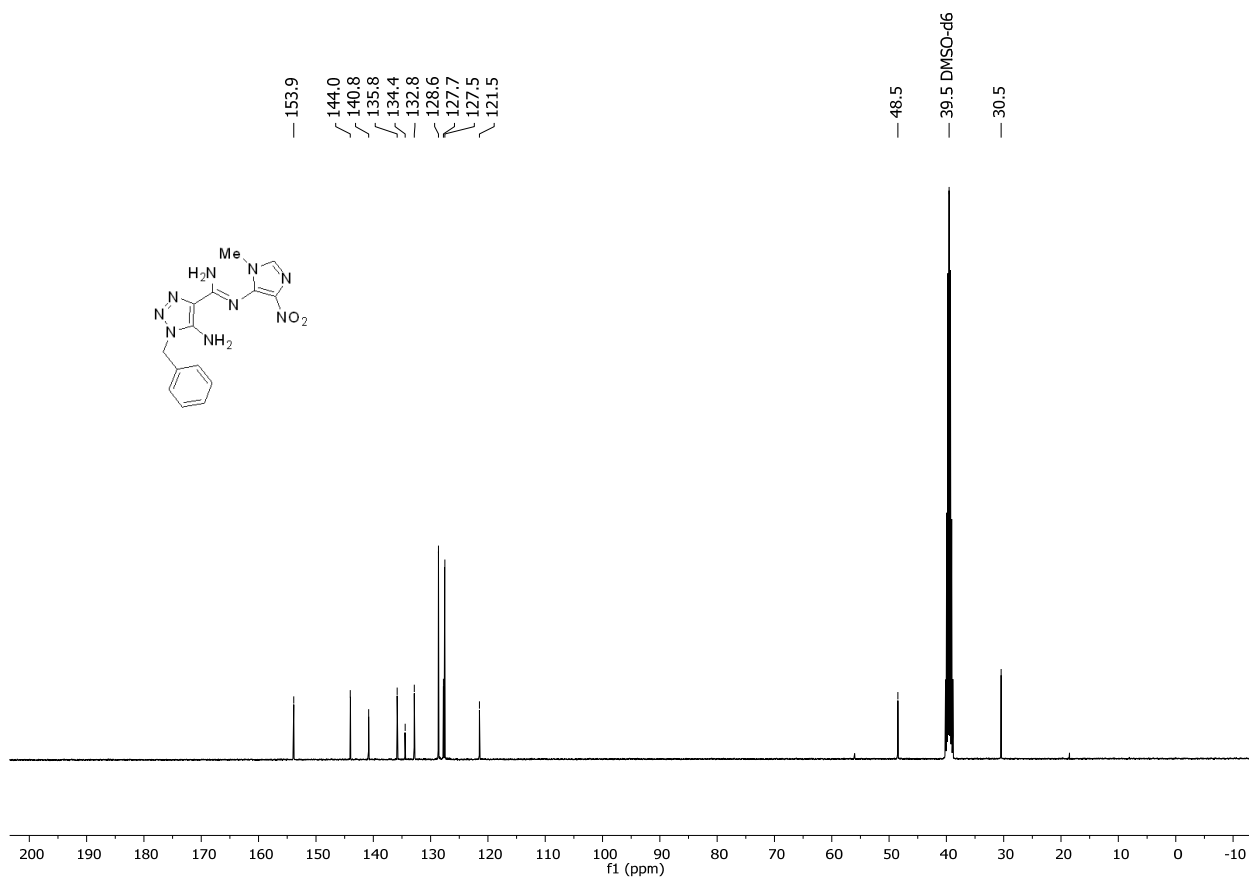

Fig. S32. <sup>1</sup>H NMR spectrum (DMSO-*d*<sub>6</sub>) of 3p

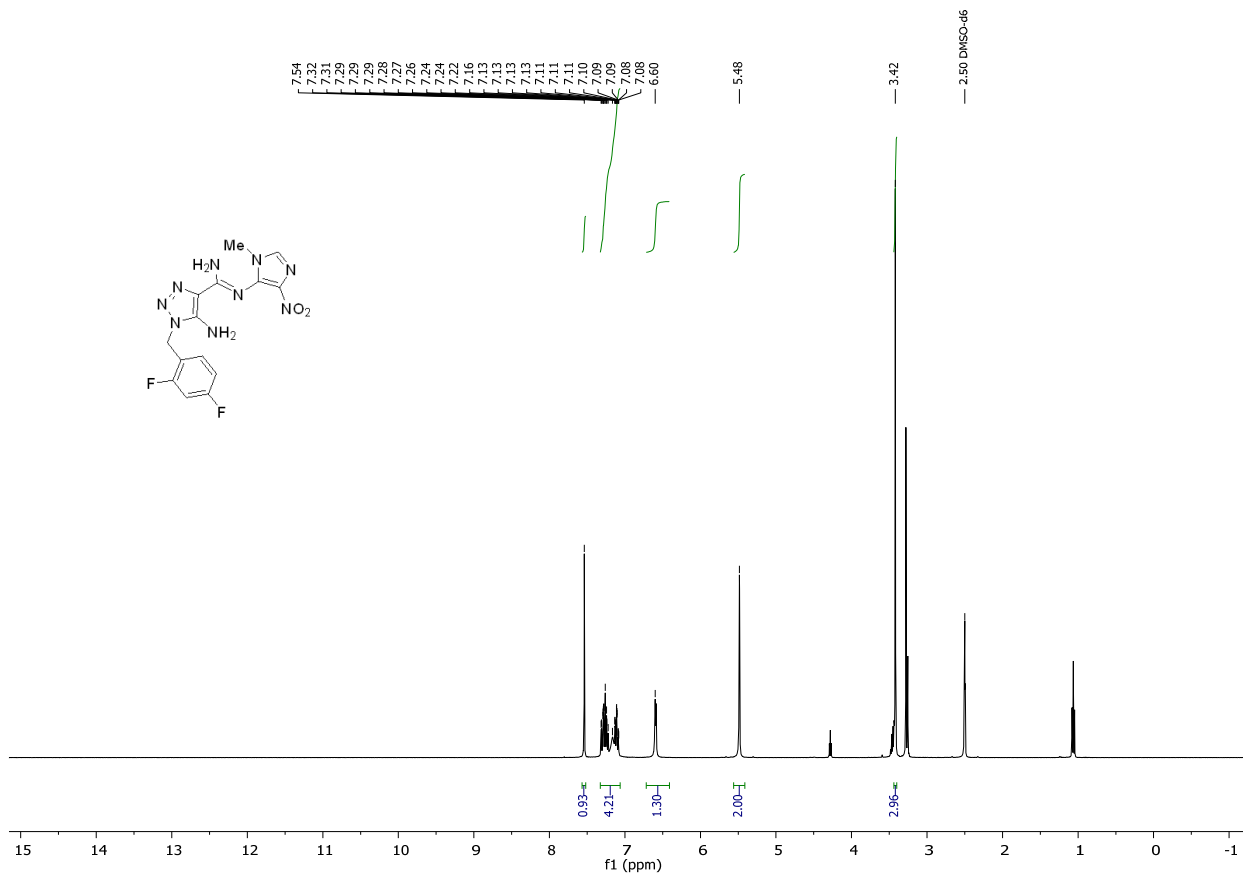

Fig. S33. <sup>13</sup>C NMR spectrum (DMSO-*d*<sub>6</sub>) of 3p

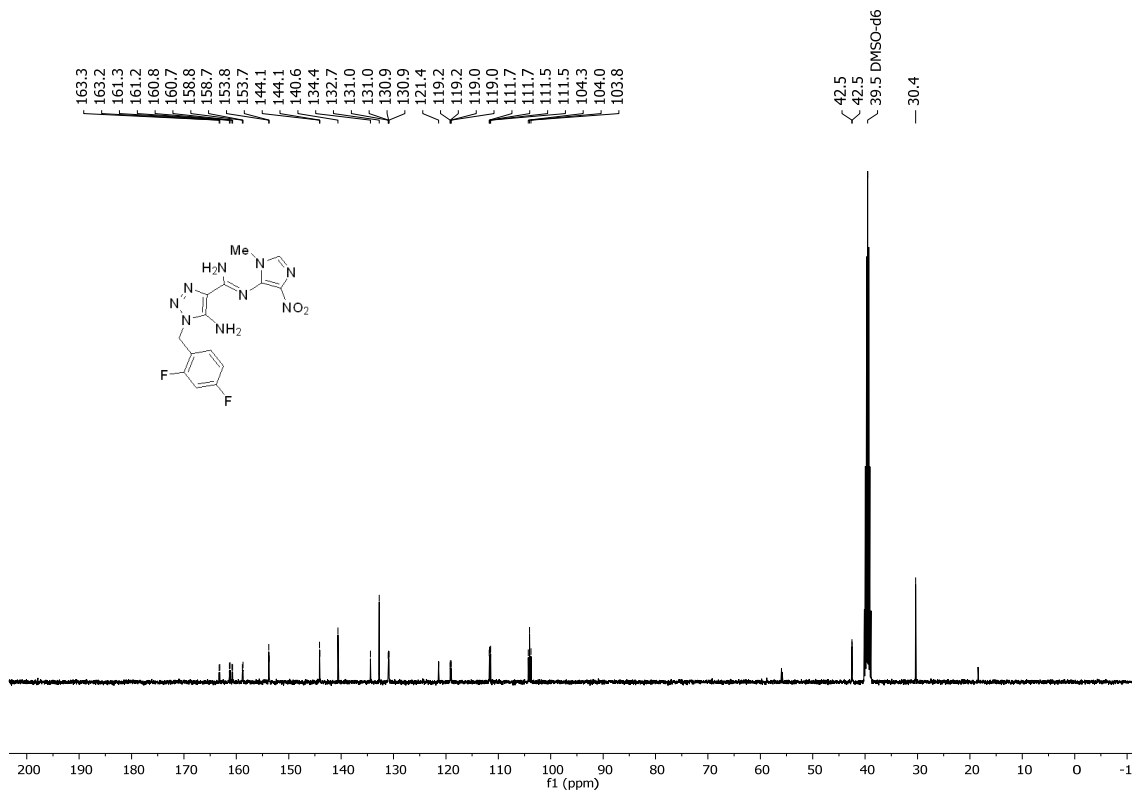

**Fig. S34.**  $^{19}\text{F}$  NMR spectrum (DMSO- $d_6$ ) of **3p**

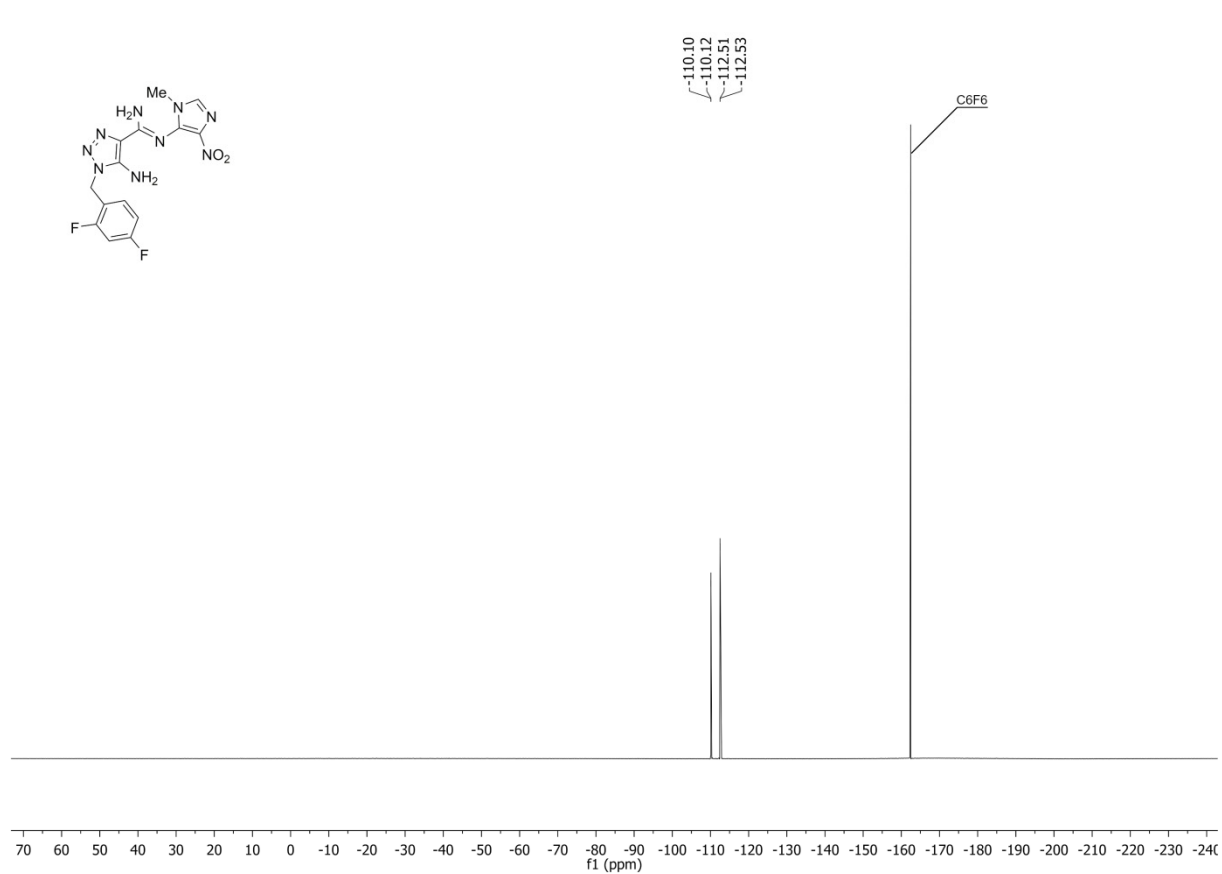

Fig. S35.  $^1\text{H}$  NMR spectrum (DMSO- $d_6$ ) of **3q**

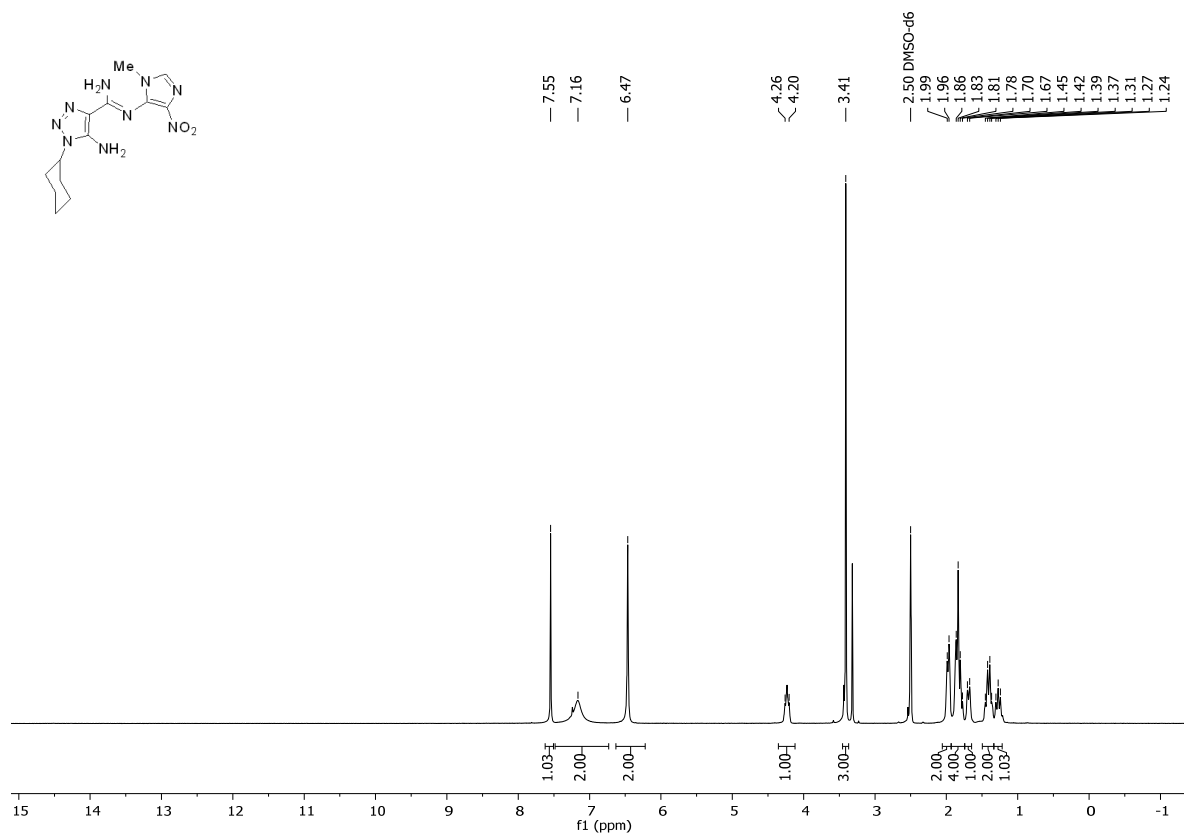

Fig. S36.  $^{13}\text{C}$  NMR spectrum (DMSO- $d_6$ ) of **3q**

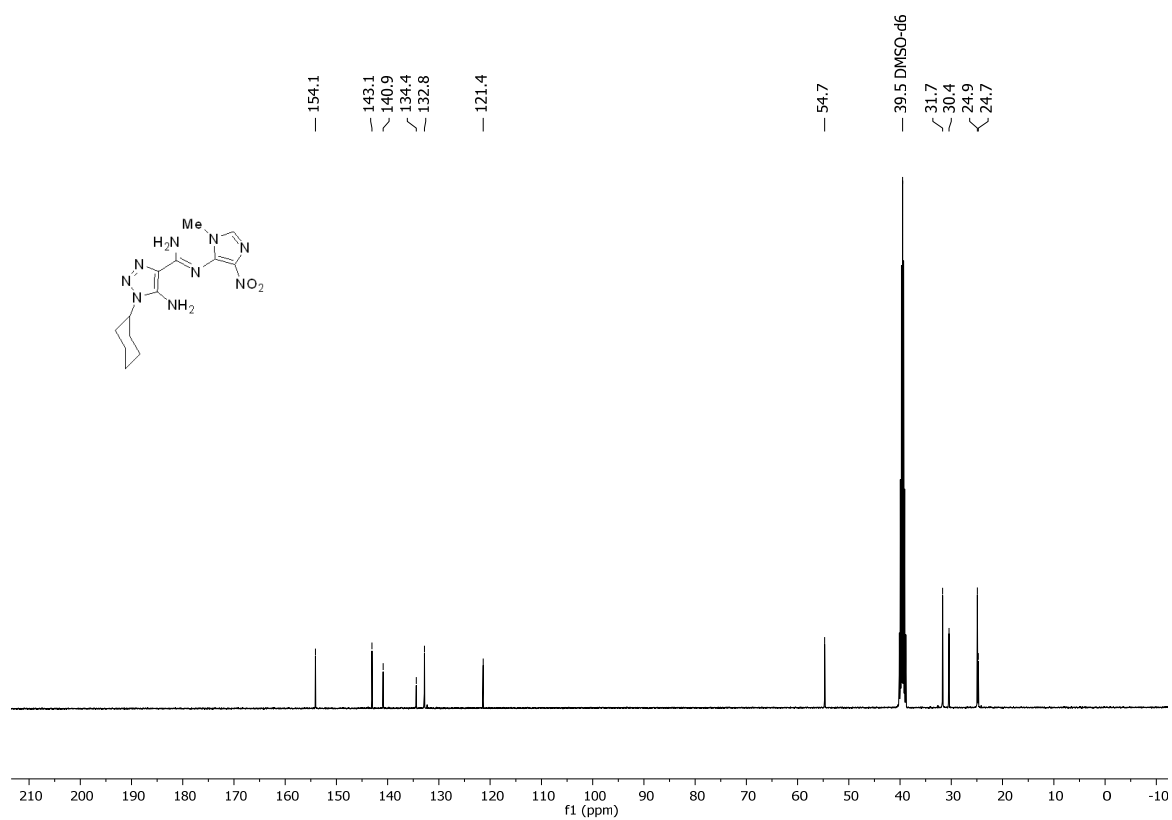

Fig. S37.  $^1\text{H}$  NMR spectrum (DMSO- $d_6$ ) of **3r**

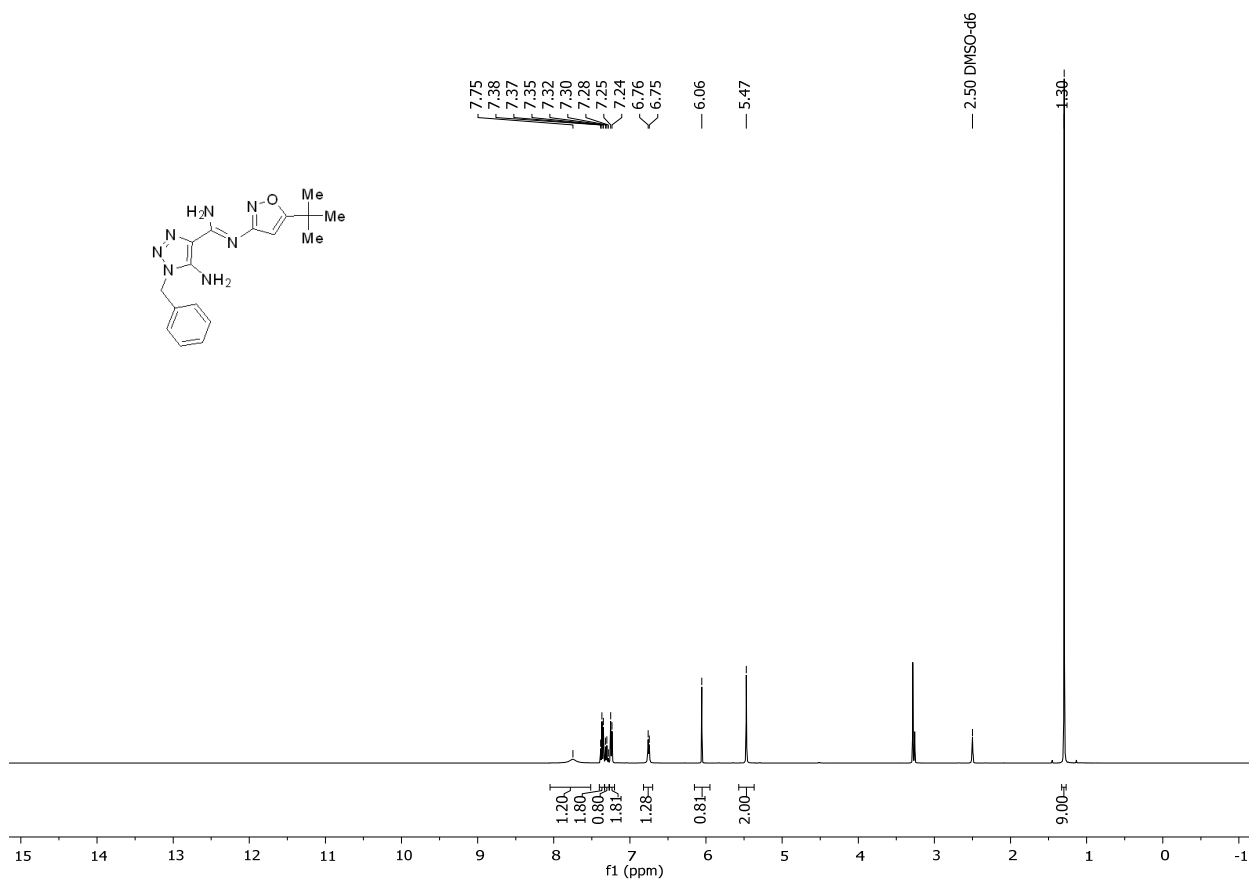

Fig. S38.  $^{13}\text{C}$  NMR spectrum (DMSO- $d_6$ ) of **3r**

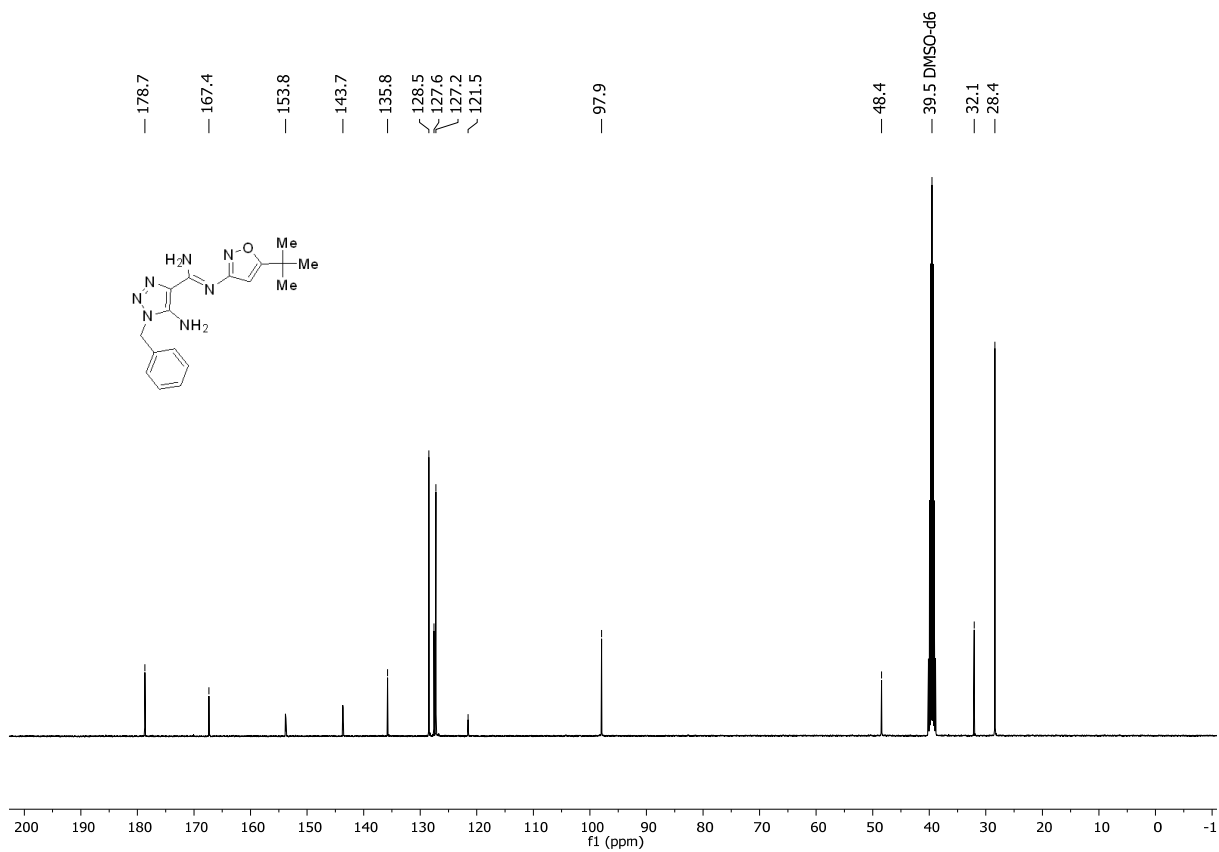



Fig. 38A. HMBC spectrum (DMSO-d<sub>6</sub>) of **3r**

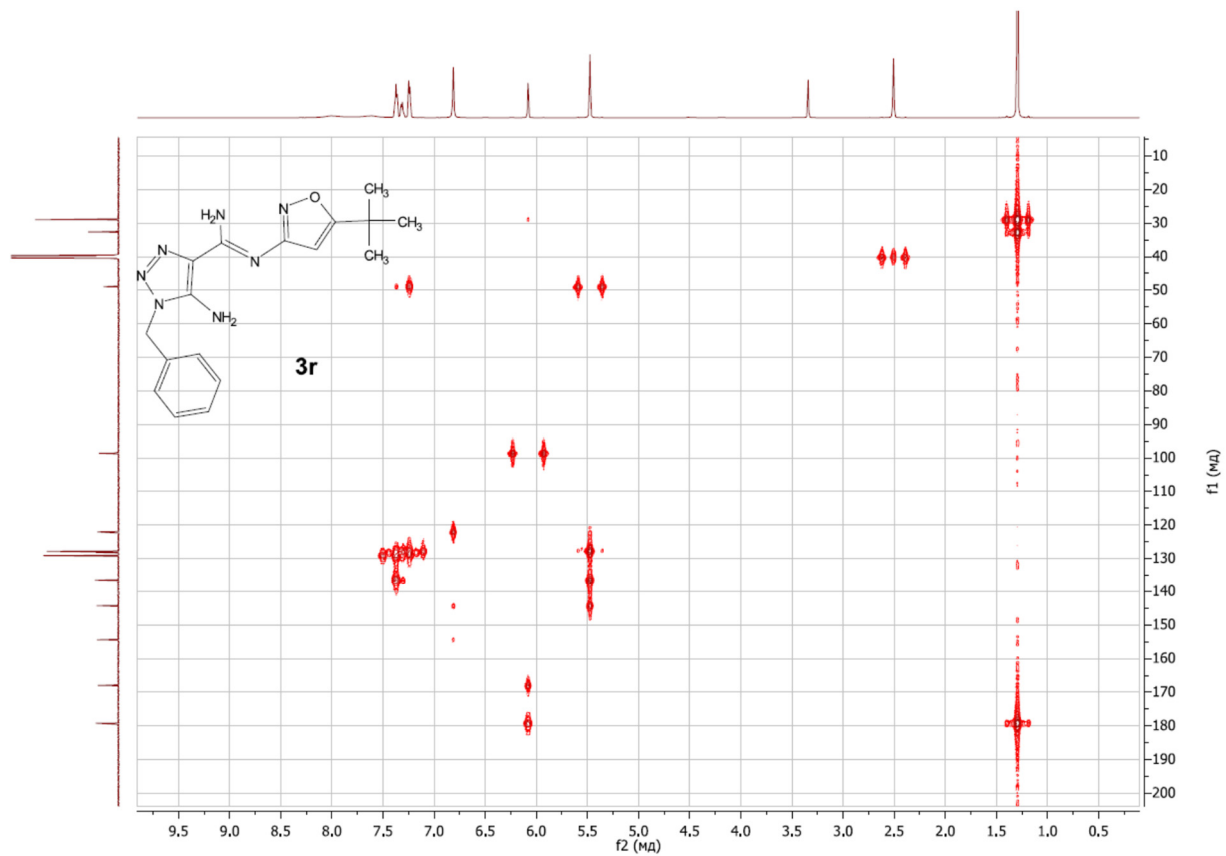

Fig. S39.  $^1\text{H}$  NMR spectrum (DMSO- $d_6$ ) of **3s**

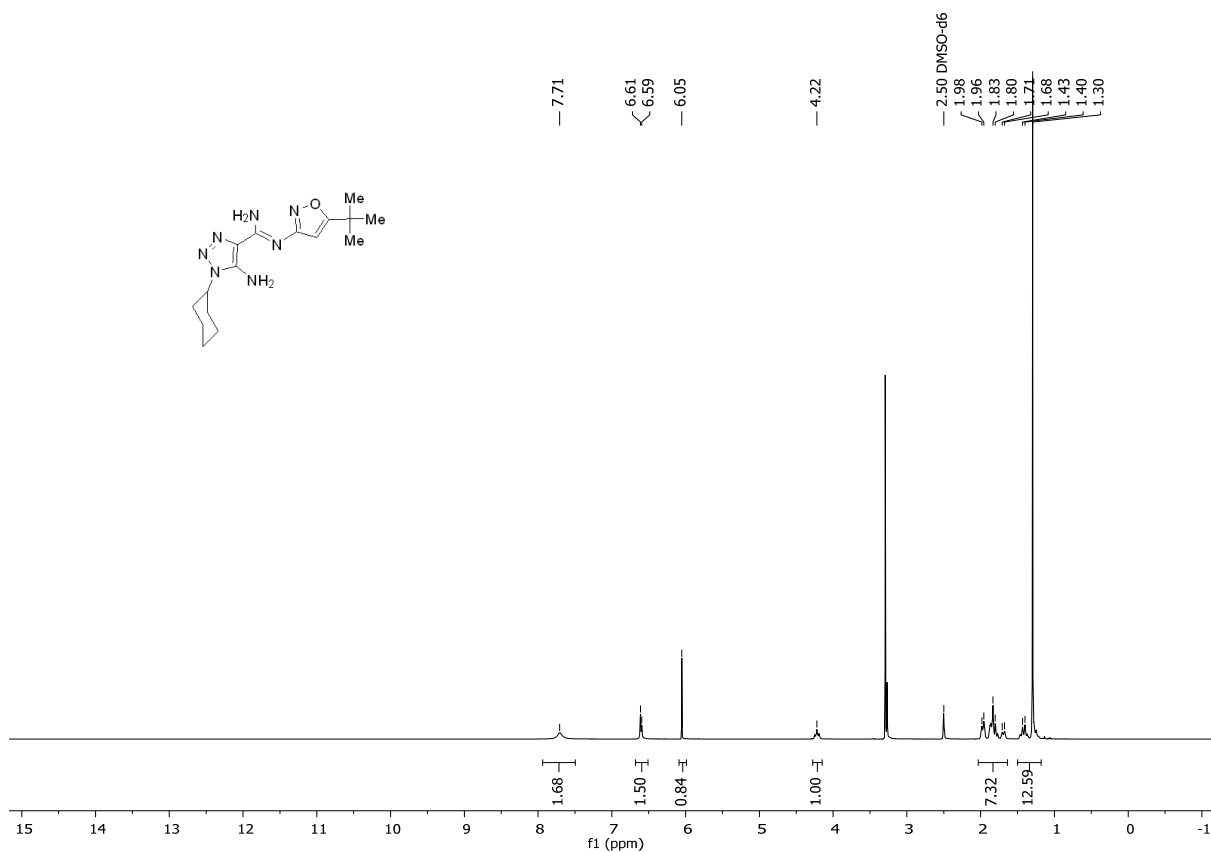

Fig. S40.  $^{13}\text{C}$  NMR spectrum (DMSO- $d_6$ ) of **3s**

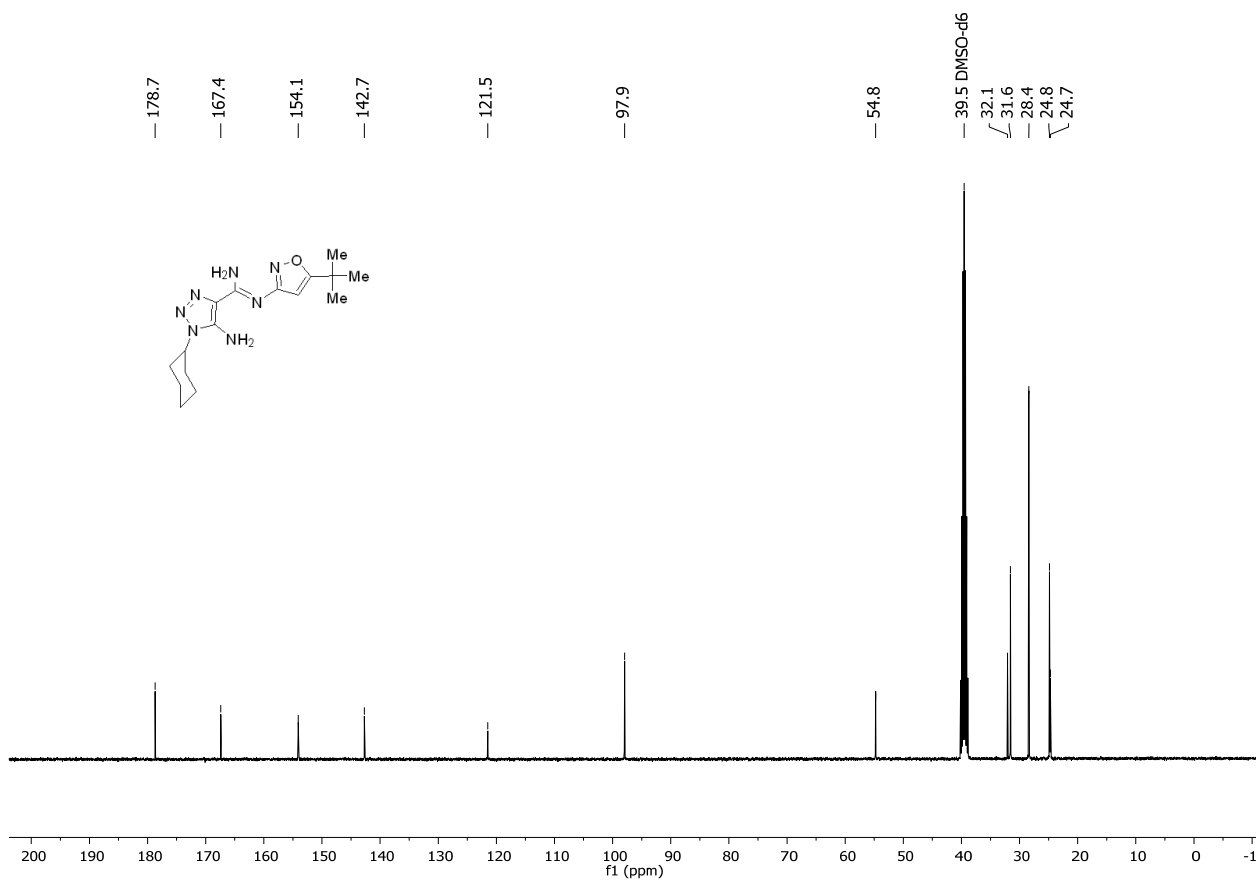

Fig. S41.  $^1\text{H}$  NMR spectrum (DMSO- $d_6$ ) of 3t

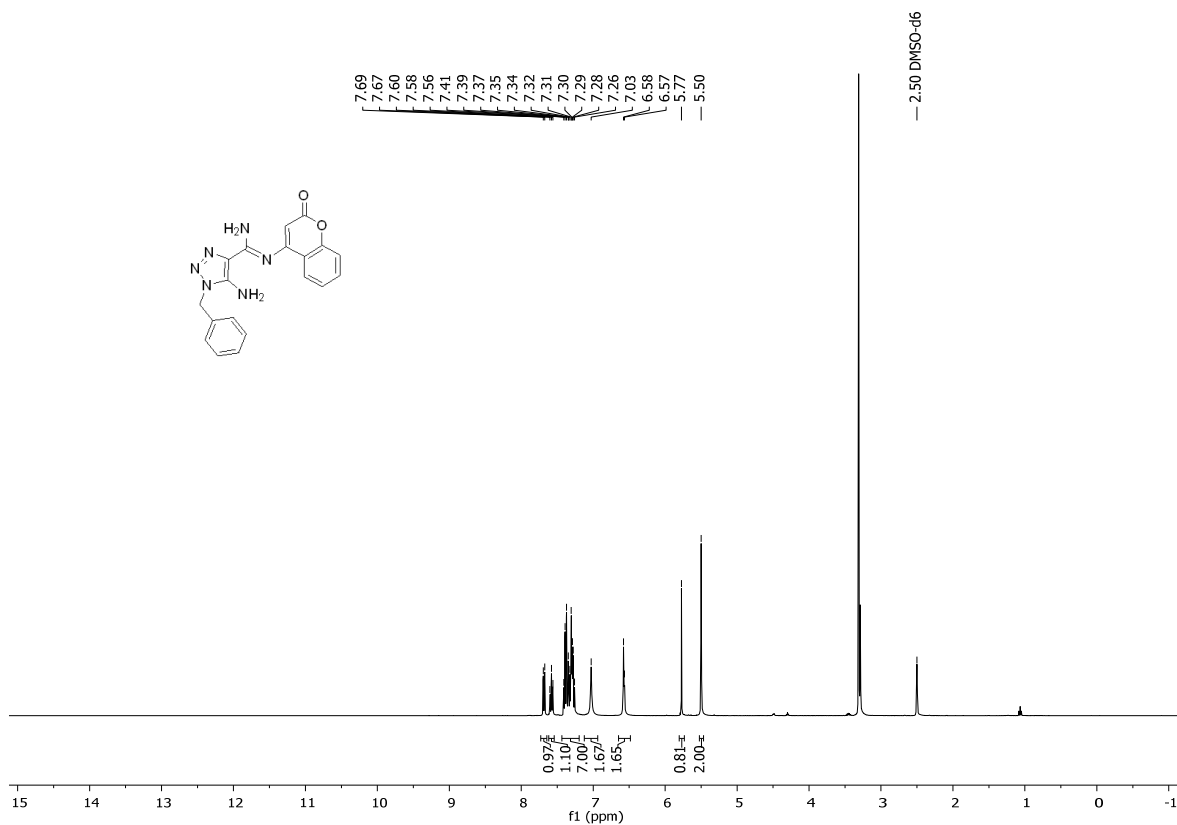

Fig. S42.  $^{13}\text{C}$  NMR spectrum (DMSO- $d_6$ ) of 3t

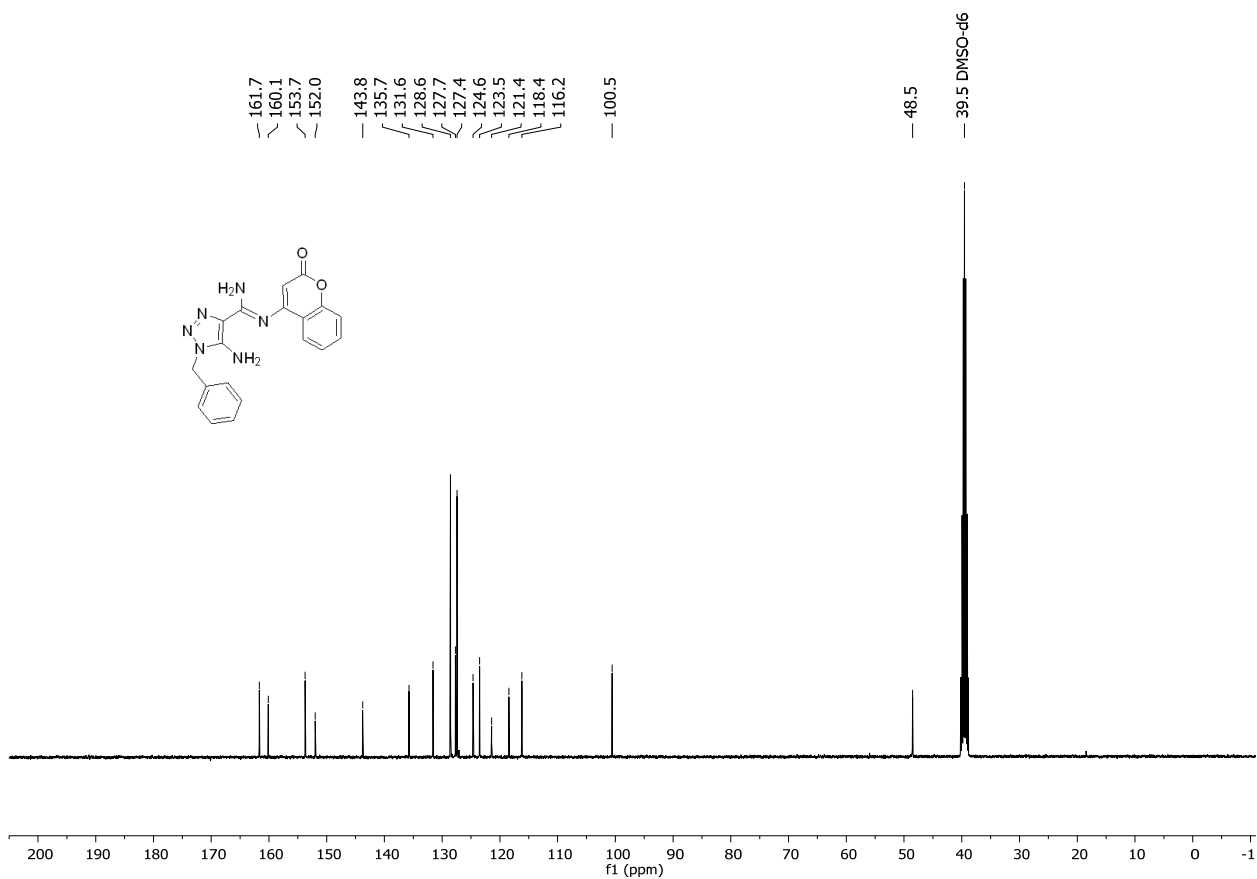

Fig. S43. <sup>1</sup>H NMR spectrum (DMSO-d<sub>6</sub>) of **3u**

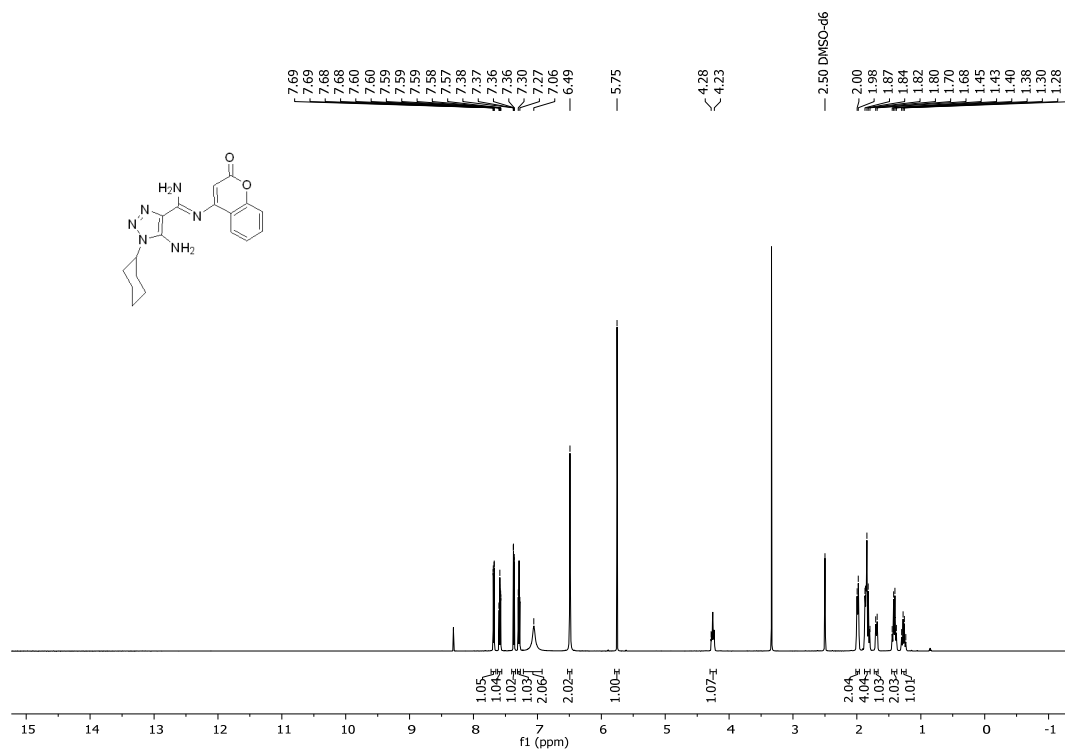

Fig. S44. <sup>13</sup>C NMR spectrum (DMSO-d<sub>6</sub>) of **3u**

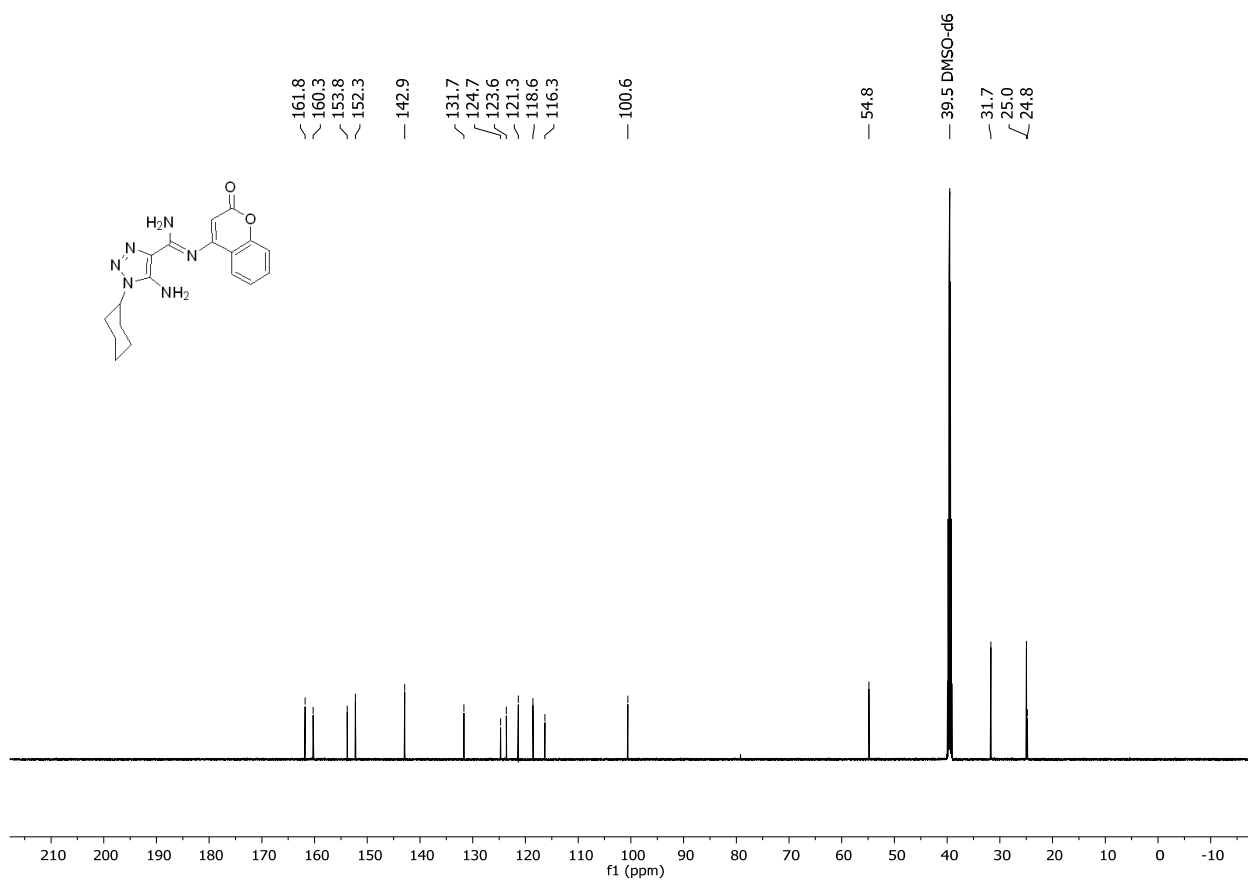

### X-ray Single Crystal Data for 3g (CCDC: 2298850)

**Procedure for the sample preparation:** Compound 3g (20 mg) was dissolved in EtOH.

After slow evaporation at room temperature, the single crystals were afforded.

**Fig. S45.** Crystal Structure of 3g (50% probability level)

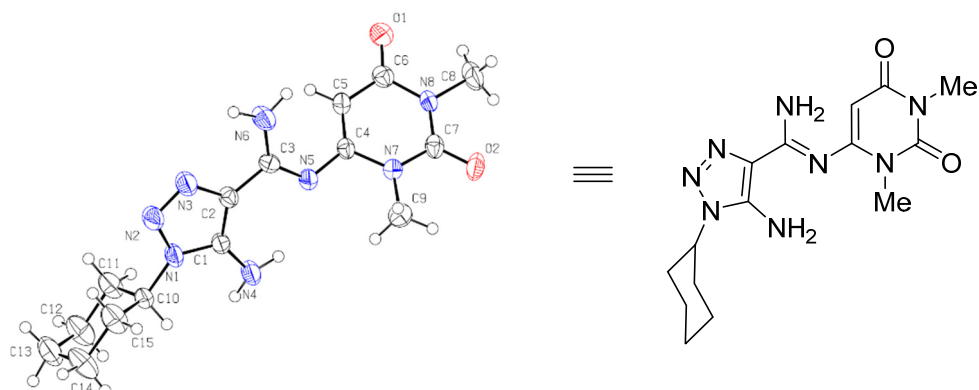

---

|                                                                                        |                                                               |
|----------------------------------------------------------------------------------------|---------------------------------------------------------------|
| Chemical formula                                                                       | C <sub>15</sub> H <sub>22</sub> N <sub>8</sub> O <sub>2</sub> |
| Formula weight                                                                         | 346.40                                                        |
| Temperature/K                                                                          | 295                                                           |
| Crystal system                                                                         | Monoclinic                                                    |
| Space group                                                                            | <i>P</i> 2 <sub>1</sub> / <i>c</i>                            |
| <i>a</i> /Å                                                                            | 14.734(3)                                                     |
| <i>b</i> /Å                                                                            | 9.000(2)                                                      |
| <i>c</i> /Å                                                                            | 13.125(4)                                                     |
| $\alpha$ /°                                                                            | 90                                                            |
| $\beta$ /°                                                                             | 104.29                                                        |
| $\gamma$ /°                                                                            | 90                                                            |
| Volume/Å <sup>3</sup>                                                                  | 1686.6(8)                                                     |
| <i>Z</i>                                                                               | 4                                                             |
| Radiation type                                                                         | Mo <i>K</i> $\alpha$                                          |
| <i>D</i> <sub>x</sub> /Mg m <sup>-3</sup>                                              | 1.364                                                         |
| $\mu$ /mm <sup>-1</sup>                                                                | 0.10                                                          |
| <i>F</i> (000)                                                                         | 736                                                           |
| Crystal size/mm                                                                        | 0.45 × 0.3 × 0.04                                             |
| $\theta_{\max}$ , $\theta_{\min}$ /°                                                   | 29.5, 2.7                                                     |
| Index ranges                                                                           | -20 ≤ <i>h</i> ≤ 20, -11 ≤ <i>k</i> ≤ 11, -17 ≤ <i>l</i> ≤ 17 |
| Measured reflections                                                                   | 6415                                                          |
| Independent reflections                                                                | 6415                                                          |
| Reflections with <i>I</i> > 2 $\sigma$ ( <i>I</i> )                                    | 3101                                                          |
| Reflections/parameters/restraints                                                      | 6415/244/0                                                    |
| Goodness-of-fit                                                                        | 0.87                                                          |
| Final <i>R</i> indexes [ <i>F</i> <sup>2</sup> > 2 $\sigma$ ( <i>F</i> <sup>2</sup> )] | <i>R</i> <sub>1</sub> = 0.069, <i>wR</i> <sub>2</sub> = 0.185 |
| Final <i>R</i> indexes [all data]                                                      | <i>R</i> <sub>1</sub> = 0.135, <i>wR</i> <sub>2</sub> = 0.207 |
| $\Delta\rho_{\max}$ , $\Delta\rho_{\min}$ /e Å <sup>-3</sup>                           | 0.31, -0.35                                                   |

---
